# Supplementary material for: Phenotypic plasticity and evolution of thermal tolerance in bacteria from temperate and hot spring environments
Source: PeerJ journal article supplement (doi:10.7717/peerj.11734), 2021-07-23
Supplement: suplem01_900px_1100px.pdf [file suplem01_900px_1100px.pdf]

*Bacillus cereus*

*Bacillus subtilis*

Temperate lagoon

| strain | 37°C | 44°C |
|--------|------|------|
| 370a   |      |      |
| 102    |      |      |
| 111b   |      |      |

| strain | 37°C | 44°C | 50°C | 55°C |
|--------|------|------|------|------|
| 21     |      |      |      |      |
| 90     |      |      |      |      |
| 427    |      |      |      |      |

Hot springs

|    |  |  |
|----|--|--|
| 11 |  |  |
| 28 |  |  |
| 51 |  |  |

|      |  |  |  |  |
|------|--|--|--|--|
| PY79 |  |  |  |  |
| 2    |  |  |  |  |
| 30   |  |  |  |  |
| 45   |  |  |  |  |
