# Supplementary material for: Phenotypic plasticity and evolution of thermal tolerance in bacteria from temperate and hot spring environments
Source: PeerJ journal article supplement (doi:10.7717/peerj.11734), 2021-07-23

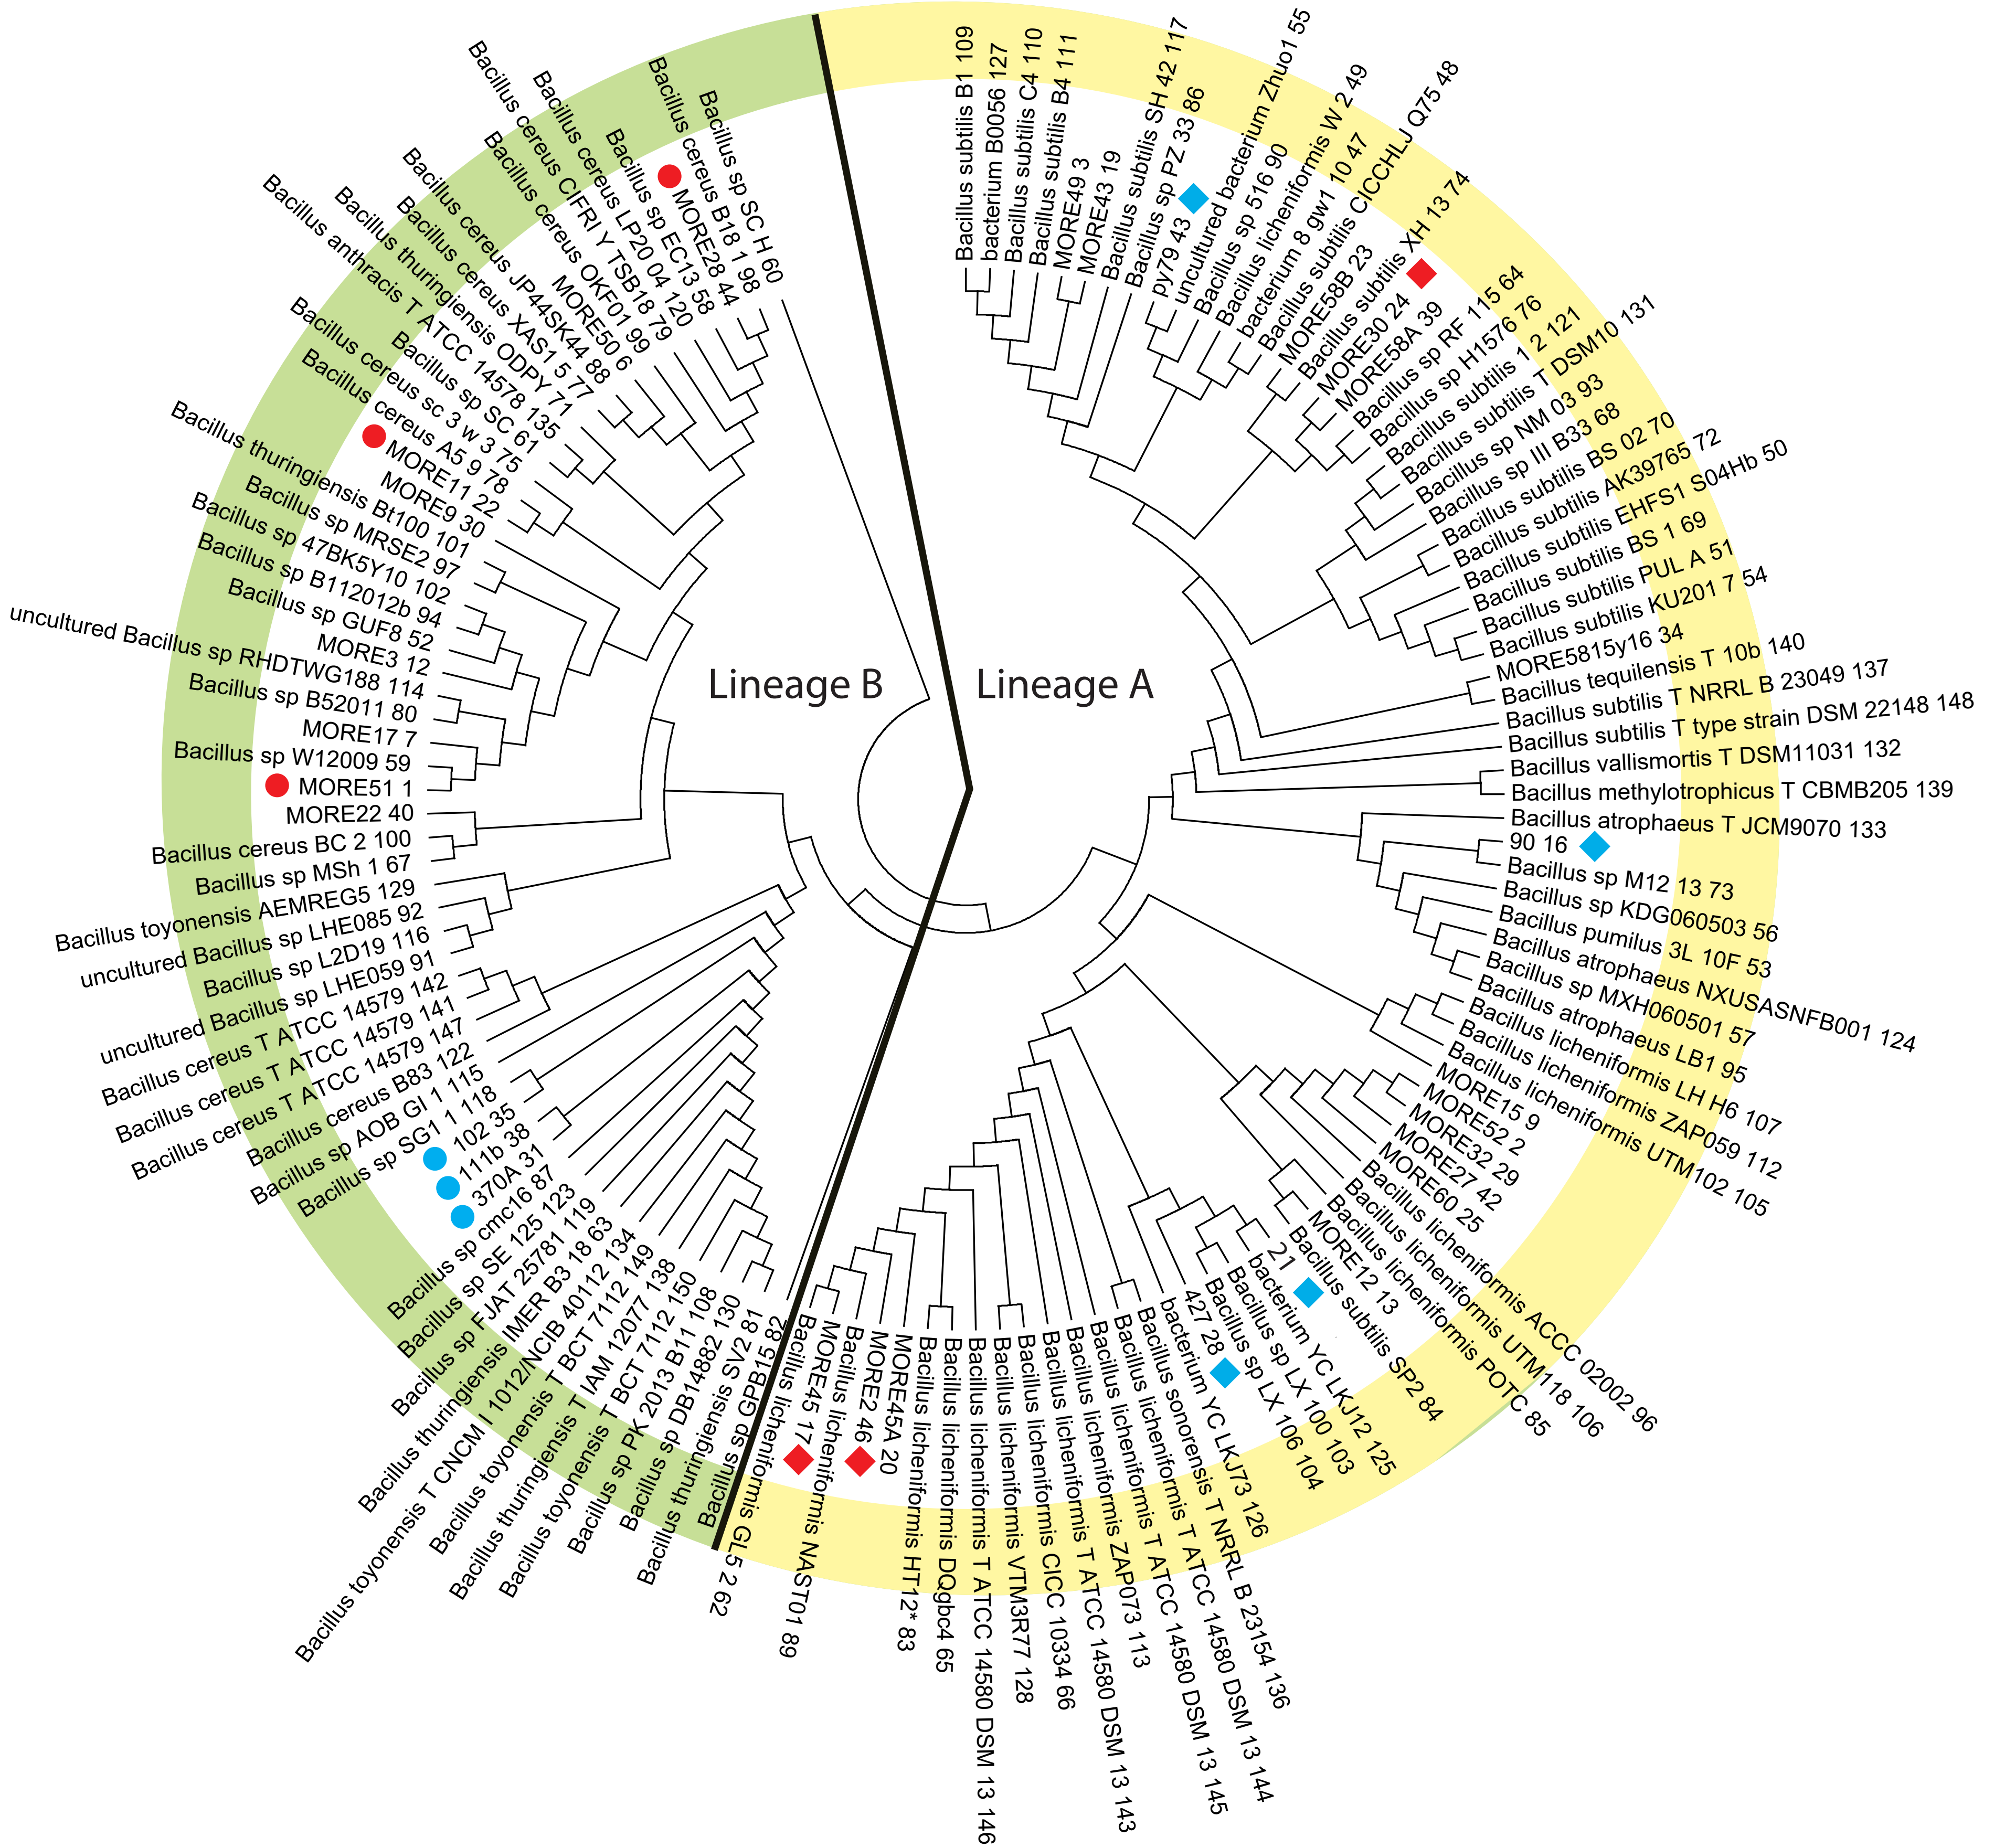

Supplement: suplem02_1500px_1500px.pdf [file suplem02_1500px_1500px.pdf]
