# Supplementary material for: Phenotypic plasticity and evolution of thermal tolerance in bacteria from temperate and hot spring environments
Source: PeerJ. 2021 Jul 23;9:e11734. doi: 10.7717/peerj.11734 (PMC8312496; doi:10.7717/peerj.11734)
Supplement: Supplemental Information 1 [file peerj-09-11734-s001.xlsx]

## Sheet:  Table 1
Diameter (millimeters) of single colonies. Data used for Figure 2
Bacillus cereus
strain	diameter (mm)												ratio
	sample1	.	.	sample2	.	.	sample3	.	.	sample4	.	.	sample1	.	.	sample2	.	.	sample3	.	.	sample4	.	.
370a	5.64	3.74	2.99	1.3	0.92	1.58	0	0	0	0	0	0	2.82	1.87	1.495	0.65	0.46	0.79	0	0	0	0	0	0
	10.29	9.85	6.59	4.23	5.88	2.41	0	0	0	0	0	0	5.145	4.925	3.295	2.115	2.94	1.205	0	0	0	0	0	0
102	4	3.72	4.44	2.02	1.14	1.14	0	0	0	0	0	0	2	1.86	2.22	1.01	0.57	0.57	0	0	0	0	0	0
	6.72	9.44	8.63	2.55	3.79	2.64	2.59	1.83	1.82	1.07	0.71	1.28	3.36	4.72	4.315	1.275	1.895	1.32	1.295	0.915	0.91	0.535	0.355	0.64
111b	2.32	4.38	3.93	1.14	0.79	0.88	0	0	0	0	0	0	1.16	2.19	1.965	0.57	0.395	0.44	0	0	0	0	0	0
	9.03	7.58	6.88	4.49	4.32	2.99	0	0	0	0	0	0	4.515	3.79	3.44	2.245	2.16	1.495	0	0	0	0	0	0
11	3.61	4.51	3.25	6.52	6.08	7.4	0	0	0	0	0	0	1.805	2.255	1.625	3.26	3.04	3.7	0	0	0	0	0	0
	7.44	9.74	7.57	12.7	9.17	9.61	0.64	0.822	0.93	1.05	0.58	1.29	3.72	4.87	3.785	6.35	4.585	4.805	0.32	0.411	0.465	0.525	0.29	0.645
28	4.06	4.85	4.25	7.49	6.26	5.02	0.9	0.57	0.85	0	0	0	2.03	2.425	2.125	3.745	3.13	2.51	0.45	0.285	0.425	0	0	0
	9.18	5.19	6.63	10.9	7.58	6.35	1.42	0.9	0.95	1.92	1.92	1.3	4.59	2.595	3.315	5.45	3.79	3.175	0.71	0.45	0.475	0.96	0.96	0.65
51	8.22	7.08	8.83	6.79	7.67	7.67	0	0	0	0	0	0	4.11	3.54	4.415	3.395	3.835	3.835	0	0	0	0	0	0
	10.09	10.56	14.54	8.37	7.23	10.23	0	0	0	1.92	1.3	1.55	5.045	5.28	7.27	4.185	3.615	5.115	0	0	0	0.96	0.65	0.775
Bacillus subtilis
strain	diameter (mm)												ratio
	sample1	.	.	sample2	.	.	sample3	.	.	sample4	.	.	sample1	.	.	sample2	.	.	sample3	.	.	sample4	.	.
21	2.17	1.53	2.17	4.27	4.07	3.32	2.21	1.74	2.34	1.84	2.53	1.61	1.085	0.765	1.085	2.135	2.035	1.66	1.105	0.87	1.17	0.92	1.265	0.805
	6.12	5.61	6.25	7.33	5.29	9.71	7.36	2.07	7.36	1.61	2.01	2.01	3.06	2.805	3.125	3.665	2.645	4.855	3.68	1.035	3.68	0.805	1.005	1.005
90	1.65	1.27	1.78	1.41	1.58	1.58	0.87	1	0.8	0	0	0	0.825	0.635	0.89	0.705	0.79	0.79	0.435	0.5	0.4	0	0	0
	2.55	2.55	2.17	2.38	2.29	2.38	2	1.33	1.54	0	0	0	1.275	1.275	1.085	1.19	1.145	1.19	1	0.665	0.77	0	0	0
427	3.7	2.55	2.29	3.17	4.14	2.64	1.74	1.2	0.87	0.59	1.94	1.13	1.85	1.275	1.145	1.585	2.07	1.32	0.87	0.6	0.435	0.295	0.97	0.565
	5.1	4.97	2.93	6.7	7.14	6.43	3.21	2.16	7.76	1.67	2.64	1.29	2.55	2.485	1.465	3.35	3.57	3.215	1.605	1.08	3.88	0.835	1.32	0.645
PY79	1.53	1.02	1.14	1.72	1.68	1.77	0.8	0.89	0.87	0.75	1.02	1.23	0.765	0.51	0.57	0.86	0.84	0.885	0.4	0.445	0.435	0.375	0.51	0.615
	2.29	1.78	1.78	2.56	2.47	2.84	2.07	1.6	1.6	0.86	0.81	1.24	1.145	0.89	0.89	1.28	1.235	1.42	1.035	0.8	0.8	0.43	0.405	0.62
2	2.8	1.4	1.4	5.11	3.35	5.02	3.52	3.21	6.09	3.13	2.97	2.91	1.4	0.7	0.7	2.555	1.675	2.51	1.76	1.605	3.045	1.565	1.485	1.455
	5.36	6.12	5.1	5.9	4.58	5.99	3.68	4.75	4.15	4.8	6.7	6.59	2.68	3.06	2.55	2.95	2.29	2.995	1.84	2.375	2.075	2.4	3.35	3.295
30	2.04	1.4	2.42	2.91	2.2	4.23	1.47	2.14	2.67	1.24	1.45	1.67	1.02	0.7	1.21	1.455	1.1	2.115	0.735	1.07	1.335	0.62	0.725	0.835
	2.16	1.53	2.8	2.73	6.26	4.41	2.14	1.54	2.34	1.45	1.67	0.91	1.08	0.765	1.4	1.365	3.13	2.205	1.07	0.77	1.17	0.725	0.835	0.455
45	1.02	1.78	1.27	4.58	4.58	4.32	4.41	2.74	2.74	2.71	1.5	1.87	0.51	0.89	0.635	2.29	2.29	2.16	2.205	1.37	1.37	1.355	0.75	0.935
	7.91	3.57	3.44	9.61	9.43	9.87	3.74	4.35	3.54	3.28	2.68	2.91	3.955	1.785	1.72	4.805	4.715	4.935	1.87	2.175	1.77	1.64	1.34	1.455
																								0
		Temperate lagoon environment (moderate temperature)
		Hot spring environment (hgh temperature)

## Sheet: Table 2
Data used for Fig 3, Fig 4 and Fig 5: Reads of OPTICAL DENSITY (O.D.) Data used to calculate doubling times and thermal niches from growth curves (Fig 03) (Fig 04), anovas (Fig 5)
strain 21
hours	17	17	17	27	27	27	37	37	37	39	39	39	41	41	41	43	43	43	49	49	49	55	55	55
0	0.155	0.159	0.163	0.083	0.083	0.083	0.084	0.085	0.084	0.082	0.083	0.082	0.085	0.084	0.085	0.091	0.089	0.093	0.083	0.083	0.083	0.083	0.082	0.083
0.5	0.128	0.136	0.144	0.082	0.084	0.083	0.083	0.084	0.083	0.083	0.083	0.082	0.087	0.086	0.087	0.094	0.092	0.097	0.084	0.084	0.083	0.083	0.083	0.083
1	0.096	0.095	0.097	0.083	0.084	0.083	0.083	0.084	0.083	0.086	0.084	0.084	0.093	0.092	0.093	0.103	0.096	0.106	0.084	0.087	0.084	0.084	0.084	0.084
1.5	0.096	0.096	0.098	0.082	0.084	0.083	0.084	0.084	0.084	0.093	0.088	0.088	0.112	0.111	0.11	0.136	0.111	0.138	0.085	0.091	0.084	0.084	0.085	0.084
2	0.097	0.097	0.099	0.083	0.084	0.083	0.086	0.086	0.086	0.109	0.098	0.097	0.153	0.152	0.15	0.178	0.156	0.18	0.087	0.1	0.086	0.084	0.085	0.085
2.5	0.098	0.098	0.1	0.083	0.084	0.083	0.09	0.09	0.089	0.151	0.127	0.125	0.208	0.203	0.203	0.248	0.195	0.239	0.089	0.115	0.089	0.084	0.086	0.084
3	0.099	0.099	0.101	0.083	0.084	0.083	0.101	0.099	0.099	0.19	0.162	0.16	0.218	0.212	0.211	0.26	0.249	0.261	0.094	0.138	0.094	0.084	0.085	0.084
3.5	0.1	0.1	0.102	0.083	0.084	0.083	0.13	0.123	0.124	0.215	0.198	0.202	0.24	0.241	0.237	0.302	0.261	0.299	0.103	0.15	0.103	0.084	0.084	0.084
4	0.1	0.1	0.103	0.083	0.084	0.084	0.16	0.161	0.159	0.243	0.218	0.214	0.282	0.281	0.277	0.325	0.301	0.322	0.116	0.171	0.115	0.084	0.085	0.084
4.5	0.101	0.102	0.105	0.084	0.085	0.084	0.182	0.189	0.187	0.278	0.258	0.252	0.326	0.327	0.321	0.323	0.304	0.309	0.137	0.201	0.134	0.084	0.085	0.084
5	0.103	0.104	0.106	0.084	0.086	0.085	0.232	0.216	0.228	0.313	0.301	0.296	0.347	0.348	0.34	0.335	0.325	0.346	0.145	0.236	0.144	0.085	0.086	0.085
5.5	0.104	0.105	0.107	0.085	0.087	0.086	0.291	0.289	0.288	0.345	0.334	0.328	0.372	0.377	0.365	0.329	0.324	0.353	0.166	0.27	0.165	0.084	0.085	0.085
6	0.106	0.107	0.11	0.086	0.088	0.087	0.312	0.313	0.291	0.363	0.358	0.352	0.381	0.383	0.375	0.346	0.352	0.365	0.179	0.265	0.176	0.085	0.085	0.085
6.5	0.108	0.109	0.113	0.088	0.091	0.089	0.38	0.372	0.343	0.391	0.389	0.384	0.398	0.4	0.396	0.343	0.348	0.348	0.204	0.304	0.2	0.084	0.086	0.084
7	0.11	0.112	0.116	0.09	0.094	0.093	0.38	0.4	0.382	0.401	0.398	0.392	0.416	0.42	0.408	0.344	0.339	0.351	0.227	0.317	0.226	0.084	0.085	0.085
7.5	0.111	0.113	0.117	0.094	0.099	0.097	0.413	0.423	0.405	0.394	0.382	0.364	0.423	0.435	0.422	0.342	0.327	0.348	0.263	0.336	0.26	0.085	0.085	0.085
8	0.114	0.117	0.121	0.099	0.106	0.105	0.416	0.441	0.437	0.426	0.427	0.413	0.437	0.439	0.438	0.342	0.347	0.364	0.293	0.353	0.279	0.085	0.085	0.085
8.5	0.116	0.12	0.124	0.106	0.115	0.115	0.442	0.481	0.482	0.449	0.44	0.429	0.453	0.46	0.45	0.326	0.323	0.347	0.34	0.38	0.317	0.084	0.085	0.085
9	0.12	0.121	0.126	0.119	0.131	0.131	0.475	0.499	0.503	0.474	0.457	0.46	0.455	0.454	0.448	0.343	0.313	0.366	0.362	0.407	0.329	0.085	0.086	0.085
9.5	0.122	0.125	0.13	0.136	0.148	0.147	0.468	0.53	0.487	0.443	0.449	0.452	0.454	0.454	0.458	0.319	0.301	0.352	0.38	0.387	0.35	0.084	0.085	0.085
10	0.126	0.129	0.134	0.151	0.158	0.155	0.56	0.549	0.533	0.467	0.449	0.448	0.453	0.448	0.444	0.348	0.317	0.348	0.394	0.413	0.356	0.085	0.086	0.085
10.5	0.127	0.13	0.136	0.158	0.16	0.156	0.517	0.548	0.554	0.476	0.472	0.439	0.464	0.457	0.456	0.357	0.323	0.356	0.412	0.418	0.374	0.085	0.085	0.085
11	0.131	0.135	0.142	0.163	0.17	0.175	0.556	0.579	0.553	0.489	0.493	0.477	0.465	0.468	0.45	0.357	0.348	0.351	0.416	0.437	0.391	0.085	0.085	0.085
11.5	0.136	0.139	0.146	0.169	0.184	0.177	0.619	0.613	0.613	0.471	0.487	0.456	0.477	0.474	0.459	0.393	0.374	0.377	0.322	0.408	0.399	0.085	0.086	0.085
12	0.139	0.144	0.152	0.186	0.19	0.188	0.629	0.622	0.589	0.467	0.478	0.447	0.486	0.486	0.469	0.385	0.393	0.369	0.354	0.446	0.317	0.085	0.085	0.085
12.5	0.144	0.15	0.158	0.196	0.211	0.204	0.632	0.611	0.627	0.485	0.496	0.478	0.488	0.48	0.476	0.401	0.399	0.396	0.383	0.476	0.372	0.085	0.085	0.085
13	0.15	0.156	0.164	0.214	0.232	0.231	0.642	0.625	0.608	0.474	0.499	0.459	0.486	0.485	0.47	0.409	0.399	0.404	0.389	0.482	0.387	0.085	0.085	0.085
13.5	0.156	0.161	0.166	0.229	0.245	0.242	0.654	0.636	0.63	0.492	0.494	0.499	0.501	0.503	0.482	0.438	0.422	0.429	0.418	0.506	0.417	0.085	0.086	0.085
14	0.161	0.16	0.166	0.267	0.271	0.262	0.672	0.672	0.664	0.494	0.489	0.484	0.503	0.502	0.483	0.455	0.429	0.425	0.418	0.5	0.42	0.085	0.086	0.085
14.5	0.162	0.162	0.167	0.289	0.297	0.289	0.688	0.693	0.706	0.515	0.504	0.513	0.514	0.504	0.494	0.458	0.452	0.433	0.46	0.535	0.46	0.085	0.086	0.085
15	0.164	0.163	0.169	0.314	0.328	0.322	0.686	0.695	0.724	0.511	0.491	0.499	0.526	0.522	0.504	0.482	0.468	0.457	0.477	0.543	0.462	0.085	0.085	0.085
15.5	0.165	0.165	0.172	0.353	0.36	0.358	0.698	0.71	0.753	0.517	0.515	0.536	0.537	0.543	0.517	0.502	0.489	0.481	0.51	0.568	0.496	0.085	0.087	0.085
16	0.166	0.166	0.175	0.388	0.397	0.395	0.688	0.711	0.758	0.518	0.516	0.528	0.537	0.536	0.516	0.505	0.499	0.491	0.53	0.579	0.516	0.085	0.086	0.085
16.5	0.167	0.17	0.178	0.407	0.425	0.42	0.681	0.721	0.762	0.522	0.523	0.559	0.557	0.556	0.54	0.523	0.513	0.506	0.504	0.531	0.502	0.085	0.085	0.085
17	0.171	0.172	0.182	0.448	0.448	0.444	0.678	0.722	0.764	0.525	0.528	0.566	0.563	0.569	0.556	0.534	0.524	0.518	0.519	0.532	0.511	0.085	0.085	0.085
17.5	0.173	0.175	0.183	0.491	0.477	0.485	0.686	0.734	0.777	0.521	0.528	0.557	0.565	0.568	0.553	0.555	0.545	0.542	0.566	0.577	0.561	0.085	0.085	0.085
18	0.175	0.179	0.188	0.524	0.547	0.495	0.698	0.74	0.78	0.521	0.541	0.57	0.585	0.589	0.568	0.568	0.558	0.554	0.54	0.523	0.554	0.085	0.087	0.085
18.5	0.178	0.182	0.191	0.551	0.54	0.509	0.691	0.757	0.778	0.522	0.538	0.591	0.58	0.597	0.561	0.582	0.573	0.569	0.578	0.533	0.589	0.085	0.087	0.085
19	0.181	0.185	0.195	0.579	0.607	0.548	0.699	0.757	0.784	0.525	0.546	0.584	0.601	0.618	0.582	0.592	0.584	0.578	0.563	0.505	0.57	0.085	0.087	0.085
19.5	0.185	0.191	0.202	0.595	0.631	0.596	0.689	0.76	0.77	0.522	0.577	0.588	0.615	0.633	0.598	0.605	0.595	0.589	0.574	0.501	0.593	0.085	0.087	0.085
20	0.187	0.195	0.205	0.555	0.608	0.55	0.695	0.761	0.773	0.515	0.558	0.578	0.625	0.64	0.608	0.616	0.605	0.6	0.543	0.474	0.581	0.085	0.086	0.085
20.5	0.19	0.195	0.209	0.551	0.595	0.543	0.69	0.77	0.765	0.507	0.561	0.571	0.635	0.648	0.616	0.621	0.61	0.602	0.522	0.468	0.577	0.085	0.087	0.086
21	0.197	0.202	0.213	0.646	0.62	0.541	0.678	0.75	0.752	0.5	0.572	0.596	0.645	0.659	0.628	0.634	0.621	0.617	0.477	0.451	0.55	0.085	0.086	0.085
21.5	0.201	0.207	0.22	0.607	0.665	0.626	0.665	0.733	0.741	0.491	0.563	0.581	0.66	0.671	0.644	0.649	0.636	0.63	0.454	0.434	0.482	0.085	0.086	0.086
22	0.206	0.212	0.223	0.599	0.664	0.618	0.646	0.709	0.723	0.482	0.56	0.586	0.672	0.69	0.656	0.662	0.649	0.642	0.451	0.427	0.482	0.085	0.086	0.085
strain 90
hours	17	17	17	27	27	27	37	37	37	39	39	39	41	41	41	43	43	43	49	49	49	55	55	55
0	0.107	0.16	0.165	0.084	0.087	0.089	0.09	0.091	0.093	0.087	0.087	0.087	0.087	0.087	0.091	0.095	0.095	0.095	0.083	0.084	0.086	0.086	0.085	0.087
0.5	0.111	0.114	0.142	0.084	0.088	0.09	0.092	0.093	0.094	0.091	0.091	0.091	0.09	0.09	0.093	0.103	0.103	0.103	0.086	0.088	0.091	0.086	0.086	0.087
1	0.113	0.116	0.116	0.087	0.091	0.093	0.104	0.104	0.106	0.105	0.104	0.104	0.101	0.101	0.105	0.124	0.126	0.126	0.085	0.088	0.091	0.086	0.086	0.087
1.5	0.116	0.12	0.119	0.091	0.095	0.097	0.137	0.136	0.139	0.142	0.141	0.138	0.133	0.134	0.139	0.184	0.198	0.196	0.085	0.088	0.091	0.086	0.086	0.087
2	0.12	0.125	0.125	0.099	0.104	0.106	0.197	0.199	0.204	0.21	0.207	0.19	0.194	0.186	0.194	0.246	0.252	0.264	0.085	0.088	0.091	0.087	0.087	0.088
2.5	0.125	0.13	0.131	0.11	0.117	0.119	0.28	0.28	0.281	0.262	0.267	0.267	0.256	0.264	0.271	0.277	0.273	0.293	0.085	0.088	0.091	0.087	0.087	0.088
3	0.13	0.136	0.135	0.128	0.138	0.141	0.343	0.339	0.344	0.31	0.308	0.307	0.305	0.312	0.322	0.311	0.29	0.319	0.085	0.088	0.091	0.087	0.087	0.088
3.5	0.134	0.14	0.142	0.158	0.178	0.178	0.363	0.358	0.357	0.349	0.351	0.347	0.338	0.339	0.347	0.343	0.336	0.338	0.085	0.087	0.091	0.086	0.086	0.087
4	0.141	0.149	0.148	0.195	0.222	0.227	0.382	0.377	0.384	0.384	0.385	0.376	0.358	0.363	0.37	0.36	0.364	0.371	0.085	0.088	0.091	0.087	0.087	0.088
4.5	0.149	0.161	0.159	0.225	0.278	0.269	0.431	0.424	0.433	0.41	0.41	0.416	0.394	0.397	0.399	0.386	0.363	0.374	0.085	0.087	0.091	0.087	0.087	0.088
5	0.157	0.168	0.169	0.271	0.338	0.323	0.445	0.445	0.451	0.426	0.432	0.419	0.424	0.426	0.43	0.393	0.388	0.398	0.086	0.088	0.091	0.087	0.087	0.088
5.5	0.17	0.181	0.182	0.342	0.376	0.368	0.464	0.46	0.463	0.465	0.464	0.467	0.444	0.444	0.458	0.4	0.409	0.389	0.086	0.088	0.091	0.087	0.087	0.088
6	0.181	0.194	0.195	0.356	0.402	0.404	0.494	0.487	0.497	0.478	0.476	0.472	0.467	0.464	0.48	0.39	0.378	0.398	0.086	0.087	0.09	0.087	0.087	0.088
6.5	0.197	0.214	0.217	0.408	0.422	0.43	0.529	0.52	0.525	0.488	0.484	0.483	0.494	0.491	0.502	0.399	0.399	0.403	0.086	0.087	0.09	0.087	0.087	0.088
7	0.216	0.229	0.237	0.406	0.437	0.454	0.525	0.518	0.533	0.518	0.502	0.509	0.494	0.493	0.504	0.416	0.418	0.418	0.086	0.087	0.09	0.087	0.087	0.088
7.5	0.229	0.246	0.246	0.45	0.468	0.476	0.553	0.545	0.549	0.531	0.529	0.538	0.512	0.509	0.512	0.437	0.437	0.434	0.086	0.087	0.091	0.087	0.087	0.088
8	0.248	0.261	0.271	0.501	0.483	0.497	0.57	0.568	0.575	0.537	0.538	0.553	0.533	0.53	0.523	0.429	0.421	0.406	0.086	0.087	0.09	0.087	0.087	0.088
8.5	0.26	0.293	0.28	0.587	0.526	0.527	0.588	0.587	0.595	0.541	0.538	0.558	0.51	0.513	0.53	0.445	0.422	0.431	0.086	0.087	0.09	0.087	0.087	0.088
9	0.28	0.303	0.317	0.502	0.563	0.559	0.593	0.607	0.618	0.52	0.525	0.539	0.54	0.545	0.56	0.437	0.421	0.427	0.086	0.087	0.09	0.087	0.087	0.088
9.5	0.299	0.327	0.345	0.583	0.582	0.572	0.599	0.621	0.625	0.549	0.55	0.564	0.541	0.546	0.56	0.444	0.436	0.454	0.086	0.087	0.09	0.087	0.087	0.088
10	0.305	0.336	0.336	0.627	0.585	0.608	0.64	0.644	0.653	0.562	0.563	0.572	0.561	0.561	0.58	0.476	0.445	0.438	0.086	0.087	0.09	0.087	0.087	0.088
10.5	0.334	0.384	0.359	0.601	0.631	0.631	0.647	0.637	0.637	0.539	0.574	0.577	0.555	0.556	0.567	0.471	0.437	0.439	0.086	0.087	0.09	0.087	0.087	0.088
11	0.345	0.384	0.385	0.677	0.66	0.65	0.645	0.64	0.643	0.558	0.581	0.589	0.572	0.576	0.59	0.466	0.428	0.453	0.086	0.087	0.09	0.087	0.087	0.088
11.5	0.379	0.413	0.432	0.704	0.697	0.686	0.637	0.648	0.644	0.554	0.567	0.582	0.57	0.577	0.588	0.478	0.43	0.456	0.086	0.087	0.09	0.087	0.087	0.089
12	0.409	0.465	0.467	0.69	0.684	0.718	0.651	0.658	0.656	0.564	0.57	0.584	0.58	0.587	0.598	0.488	0.446	0.445	0.086	0.087	0.09	0.087	0.087	0.088
12.5	0.43	0.506	0.513	0.689	0.691	0.696	0.649	0.658	0.657	0.586	0.592	0.594	0.576	0.581	0.598	0.507	0.437	0.456	0.087	0.087	0.09	0.087	0.087	0.088
13	0.514	0.537	0.549	0.707	0.733	0.73	0.653	0.668	0.667	0.592	0.598	0.607	0.589	0.587	0.602	0.493	0.425	0.451	0.087	0.087	0.09	0.087	0.087	0.089
13.5	0.523	0.566	0.592	0.73	0.804	0.769	0.642	0.655	0.67	0.597	0.606	0.612	0.593	0.593	0.603	0.526	0.418	0.45	0.087	0.087	0.09	0.087	0.087	0.088
14	0.5	0.541	0.544	0.752	0.817	0.822	0.618	0.632	0.647	0.62	0.636	0.636	0.586	0.588	0.599	0.517	0.414	0.45	0.088	0.087	0.09	0.087	0.087	0.088
14.5	0.564	0.605	0.586	0.773	0.845	0.853	0.644	0.657	0.667	0.62	0.624	0.627	0.589	0.595	0.609	0.524	0.428	0.463	0.088	0.087	0.09	0.087	0.087	0.088
15	0.589	0.616	0.631	0.793	0.865	0.876	0.649	0.662	0.675	0.627	0.636	0.642	0.581	0.588	0.602	0.511	0.431	0.461	0.089	0.087	0.089	0.087	0.087	0.089
15.5	0.576	0.645	0.622	0.749	0.882	0.891	0.666	0.679	0.689	0.636	0.638	0.648	0.589	0.596	0.608	0.529	0.419	0.457	0.088	0.087	0.09	0.087	0.087	0.088
16	0.605	0.646	0.672	0.758	0.901	0.927	0.699	0.697	0.707	0.646	0.652	0.657	0.592	0.597	0.608	0.551	0.418	0.462	0.088	0.087	0.09	0.087	0.087	0.088
16.5	0.654	0.676	0.691	0.766	0.925	0.925	0.686	0.704	0.718	0.653	0.663	0.665	0.586	0.593	0.606	0.539	0.422	0.457	0.089	0.087	0.09	0.087	0.087	0.088
17	0.706	0.666	0.678	0.787	0.952	0.959	0.693	0.701	0.717	0.662	0.666	0.674	0.595	0.6	0.61	0.559	0.41	0.454	0.09	0.087	0.09	0.087	0.087	0.088
17.5	0.718	0.67	0.733	0.798	0.967	0.967	0.686	0.695	0.708	0.672	0.675	0.677	0.59	0.593	0.605	0.55	0.405	0.455	0.09	0.086	0.09	0.087	0.087	0.088
18	0.719	0.716	0.783	0.813	0.985	0.973	0.699	0.706	0.721	0.67	0.676	0.681	0.584	0.588	0.608	0.546	0.406	0.453	0.09	0.087	0.09	0.087	0.087	0.088
18.5	0.763	0.762	0.768	0.823	1.008	0.991	0.708	0.711	0.72	0.678	0.683	0.687	0.583	0.587	0.596	0.561	0.404	0.451	0.091	0.086	0.09	0.087	0.086	0.088
19	0.786	0.775	0.814	0.827	1.017	1.005	0.7	0.729	0.739	0.662	0.668	0.678	0.581	0.584	0.59	0.57	0.429	0.451	0.092	0.086	0.09	0.087	0.087	0.088
19.5	0.782	0.805	0.81	0.839	1.03	1.02	0.703	0.723	0.72	0.663	0.669	0.674	0.597	0.599	0.603	0.55	0.408	0.451	0.09	0.086	0.09	0.087	0.087	0.088
20	0.799	0.83	0.81	0.85	1.046	1.028	0.717	0.726	0.734	0.673	0.675	0.681	0.585	0.583	0.586	0.589	0.41	0.449	0.092	0.086	0.09	0.087	0.087	0.088
20.5	0.806	0.84	0.839	0.859	1.064	1.042	0.717	0.714	0.706	0.684	0.676	0.684	0.566	0.565	0.57	0.574	0.418	0.447	0.09	0.086	0.09	0.087	0.087	0.089
21	0.82	0.853	0.851	0.882	1.073	1.06	0.716	0.718	0.72	0.686	0.687	0.695	0.558	0.556	0.561	0.573	0.415	0.445	0.091	0.086	0.09	0.087	0.086	0.087
21.5	0.83	0.858	0.857	0.9	1.078	1.051	0.71	0.717	0.724	0.691	0.695	0.709	0.551	0.549	0.551	0.576	0.422	0.441	0.091	0.086	0.089	0.087	0.087	0.089
22	0.837	0.881	0.88	0.919	1.089	1.059	0.703	0.713	0.721	0.691	0.699	0.706	0.549	0.545	0.547	0.579	0.419	0.441	0.091	0.085	0.089	0.087	0.087	0.088
strain 427
hours	17	17	17	27	27	27	37	37	37	39	39	39	41	41	41	43	43	43	49	49	49	55	55	55
0	0.163	0.164	0.166	0.083	0.084	0.085	0.087	0.087	0.09	0.085	0.085	0.085	0.082	0.082	0.083	0.091	0.094	0.091	0.083	0.084	0.085	0.083	0.083	0.083
0.5	0.143	0.143	0.144	0.083	0.083	0.085	0.089	0.087	0.088	0.088	0.089	0.088	0.081	0.082	0.081	0.093	0.096	0.093	0.085	0.084	0.093	0.083	0.084	0.084
1	0.099	0.099	0.101	0.083	0.084	0.086	0.093	0.093	0.093	0.105	0.106	0.105	0.081	0.082	0.083	0.096	0.097	0.096	0.088	0.085	0.104	0.084	0.084	0.085
1.5	0.099	0.1	0.103	0.084	0.084	0.09	0.106	0.109	0.106	0.163	0.165	0.164	0.082	0.082	0.084	0.113	0.114	0.108	0.095	0.087	0.128	0.084	0.084	0.084
2	0.101	0.101	0.103	0.084	0.098	0.09	0.136	0.145	0.14	0.255	0.258	0.258	0.084	0.082	0.088	0.158	0.161	0.149	0.109	0.092	0.147	0.084	0.085	0.085
2.5	0.102	0.103	0.105	0.087	0.097	0.089	0.17	0.169	0.169	0.319	0.32	0.316	0.089	0.083	0.097	0.193	0.223	0.183	0.133	0.1	0.175	0.084	0.084	0.084
3	0.103	0.104	0.107	0.09	0.094	0.091	0.194	0.198	0.193	0.382	0.382	0.371	0.104	0.085	0.125	0.252	0.244	0.235	0.151	0.117	0.214	0.084	0.084	0.084
3.5	0.104	0.105	0.107	0.096	0.102	0.096	0.23	0.238	0.227	0.442	0.431	0.437	0.14	0.089	0.157	0.262	0.258	0.257	0.175	0.144	0.244	0.084	0.084	0.084
4	0.105	0.105	0.108	0.102	0.117	0.104	0.282	0.273	0.299	0.479	0.474	0.477	0.158	0.101	0.177	0.289	0.286	0.29	0.208	0.157	0.271	0.084	0.084	0.084
4.5	0.107	0.108	0.111	0.111	0.129	0.111	0.297	0.32	0.31	0.523	0.514	0.509	0.182	0.136	0.213	0.304	0.296	0.304	0.231	0.185	0.289	0.084	0.084	0.084
5	0.109	0.11	0.112	0.125	0.146	0.125	0.36	0.357	0.367	0.527	0.519	0.515	0.208	0.156	0.251	0.316	0.309	0.31	0.26	0.218	0.318	0.085	0.084	0.085
5.5	0.11	0.111	0.113	0.144	0.157	0.142	0.386	0.404	0.403	0.577	0.571	0.566	0.259	0.172	0.293	0.318	0.315	0.316	0.287	0.248	0.35	0.084	0.084	0.085
6	0.114	0.114	0.117	0.152	0.164	0.152	0.4	0.403	0.404	0.579	0.575	0.581	0.285	0.2	0.319	0.333	0.313	0.326	0.274	0.244	0.329	0.084	0.084	0.085
6.5	0.116	0.116	0.12	0.162	0.177	0.162	0.439	0.441	0.439	0.628	0.627	0.619	0.308	0.254	0.337	0.32	0.3	0.32	0.306	0.267	0.357	0.084	0.084	0.084
7	0.119	0.12	0.123	0.171	0.192	0.171	0.454	0.478	0.47	0.654	0.655	0.651	0.357	0.293	0.387	0.328	0.314	0.331	0.321	0.292	0.367	0.084	0.084	0.085
7.5	0.119	0.119	0.125	0.183	0.211	0.182	0.503	0.516	0.506	0.657	0.653	0.655	0.343	0.308	0.387	0.353	0.306	0.325	0.345	0.316	0.388	0.085	0.085	0.085
8	0.123	0.123	0.128	0.205	0.246	0.198	0.507	0.508	0.537	0.685	0.684	0.681	0.37	0.329	0.409	0.338	0.309	0.324	0.357	0.326	0.382	0.085	0.085	0.085
8.5	0.126	0.126	0.131	0.229	0.284	0.227	0.535	0.531	0.565	0.708	0.709	0.706	0.411	0.382	0.45	0.331	0.316	0.317	0.383	0.341	0.41	0.084	0.084	0.084
9	0.128	0.128	0.134	0.252	0.309	0.242	0.542	0.551	0.577	0.732	0.731	0.731	0.426	0.394	0.462	0.36	0.295	0.317	0.404	0.356	0.451	0.085	0.085	0.084
9.5	0.131	0.131	0.137	0.288	0.3	0.29	0.592	0.607	0.577	0.749	0.751	0.746	0.449	0.409	0.49	0.357	0.297	0.329	0.417	0.371	0.463	0.084	0.084	0.085
10	0.135	0.136	0.141	0.291	0.326	0.293	0.608	0.645	0.625	0.761	0.764	0.768	0.444	0.416	0.496	0.39	0.319	0.318	0.449	0.388	0.491	0.085	0.085	0.085
10.5	0.138	0.138	0.144	0.311	0.367	0.315	0.644	0.64	0.647	0.778	0.78	0.78	0.455	0.432	0.505	0.408	0.31	0.319	0.458	0.399	0.508	0.085	0.085	0.085
11	0.144	0.144	0.15	0.344	0.404	0.347	0.701	0.701	0.662	0.803	0.809	0.808	0.491	0.457	0.472	0.405	0.319	0.327	0.477	0.414	0.531	0.085	0.084	0.085
11.5	0.148	0.147	0.154	0.401	0.446	0.388	0.736	0.716	0.685	0.812	0.817	0.814	0.474	0.447	0.486	0.417	0.321	0.341	0.451	0.408	0.493	0.085	0.085	0.085
12	0.154	0.153	0.158	0.448	0.482	0.424	0.7	0.748	0.713	0.813	0.814	0.821	0.49	0.466	0.51	0.448	0.342	0.338	0.471	0.422	0.523	0.085	0.085	0.085
12.5	0.158	0.158	0.165	0.474	0.524	0.462	0.724	0.783	0.759	0.844	0.844	0.846	0.513	0.468	0.506	0.45	0.347	0.353	0.494	0.441	0.536	0.085	0.085	0.085
13	0.164	0.164	0.171	0.511	0.563	0.496	0.744	0.817	0.778	0.865	0.857	0.867	0.52	0.486	0.542	0.461	0.353	0.348	0.474	0.432	0.498	0.085	0.085	0.085
13.5	0.167	0.168	0.172	0.549	0.604	0.54	0.773	0.831	0.832	0.87	0.867	0.867	0.524	0.493	0.533	0.454	0.365	0.359	0.489	0.443	0.494	0.085	0.085	0.085
14	0.168	0.169	0.173	0.594	0.638	0.59	0.802	0.821	0.878	0.872	0.868	0.878	0.555	0.501	0.553	0.472	0.376	0.364	0.47	0.44	0.494	0.085	0.085	0.085
14.5	0.169	0.17	0.175	0.627	0.667	0.629	0.801	0.821	0.893	0.901	0.897	0.904	0.532	0.48	0.558	0.494	0.39	0.367	0.464	0.451	0.491	0.085	0.085	0.085
15	0.173	0.173	0.179	0.67	0.686	0.647	0.836	0.752	0.911	0.898	0.875	0.89	0.554	0.527	0.572	0.508	0.399	0.367	0.449	0.454	0.488	0.085	0.085	0.085
15.5	0.175	0.176	0.181	0.681	0.687	0.67	0.81	0.773	0.811	0.907	0.907	0.924	0.569	0.52	0.572	0.525	0.404	0.364	0.446	0.458	0.487	0.085	0.085	0.085
16	0.178	0.177	0.183	0.692	0.623	0.708	0.801	0.775	0.782	0.921	0.919	0.926	0.558	0.524	0.572	0.531	0.414	0.363	0.447	0.456	0.49	0.085	0.085	0.085
16.5	0.18	0.18	0.187	0.637	0.62	0.669	0.841	0.767	0.82	0.947	0.931	0.948	0.559	0.537	0.561	0.549	0.421	0.353	0.437	0.431	0.496	0.085	0.085	0.085
17	0.183	0.183	0.191	0.648	0.617	0.658	0.863	0.795	0.851	0.961	0.952	0.962	0.557	0.53	0.554	0.557	0.429	0.348	0.435	0.427	0.498	0.085	0.085	0.085
17.5	0.185	0.185	0.19	0.648	0.636	0.652	0.89	0.802	0.881	0.977	0.964	0.98	0.554	0.53	0.544	0.568	0.435	0.341	0.43	0.43	0.499	0.085	0.085	0.085
18	0.19	0.189	0.194	0.635	0.665	0.657	0.878	0.861	0.801	0.98	0.974	1.012	0.545	0.531	0.529	0.588	0.437	0.326	0.438	0.42	0.506	0.085	0.085	0.085
18.5	0.192	0.194	0.198	0.674	0.664	0.674	0.895	0.942	0.813	1.006	0.994	1.012	0.536	0.528	0.511	0.588	0.432	0.313	0.442	0.425	0.506	0.085	0.085	0.085
19	0.198	0.198	0.203	0.674	0.684	0.684	0.91	0.867	0.793	0.992	0.998	1.022	0.522	0.525	0.489	0.589	0.421	0.3	0.448	0.424	0.51	0.085	0.085	0.085
19.5	0.198	0.199	0.212	0.685	0.69	0.698	0.921	0.828	0.795	1.012	0.989	1.02	0.506	0.529	0.471	0.603	0.417	0.285	0.454	0.422	0.513	0.085	0.085	0.085
20	0.203	0.204	0.21	0.695	0.709	0.674	0.942	0.847	0.814	0.985	1.02	0.995	0.494	0.527	0.453	0.605	0.41	0.28	0.461	0.423	0.515	0.085	0.085	0.085
20.5	0.206	0.207	0.214	0.726	0.75	0.696	0.934	0.857	0.81	0.966	0.986	0.954	0.477	0.528	0.436	0.602	0.408	0.282	0.465	0.429	0.519	0.086	0.086	0.085
21	0.211	0.211	0.223	0.733	0.781	0.702	0.948	0.79	0.788	0.93	0.958	0.919	0.464	0.523	0.42	0.6	0.392	0.265	0.468	0.436	0.523	0.085	0.085	0.085
21.5	0.217	0.215	0.224	0.753	0.769	0.76	0.948	0.74	0.76	0.908	0.941	0.886	0.458	0.523	0.411	0.594	0.379	0.258	0.475	0.447	0.526	0.085	0.085	0.085
22	0.224	0.222	0.23	0.785	0.732	0.719	0.932	0.727	0.756	0.888	0.918	0.862	0.444	0.517	0.4	0.587	0.368	0.248	0.477	0.451	0.527	0.085	0.085	0.085
strain PY79
hours	17	17	17	27	27	27	37	37	37	39	39	39	41	41	41	43	43	43	49	49	49	55	55	55
0	0.141	0.157	0.162	0.086	0.085	0.084	0.088	0.088	0.089	0.09	0.086	0.087	0.086	0.085	0.085	0.095	0.095	0.095	0.085	0.087	0.088	0.084	0.084	0.084
0.5	0.105	0.109	0.111	0.086	0.085	0.086	0.089	0.09	0.09	0.092	0.089	0.09	0.088	0.089	0.089	0.105	0.106	0.106	0.099	0.103	0.103	0.085	0.086	0.086
1	0.106	0.11	0.111	0.088	0.087	0.087	0.101	0.102	0.102	0.108	0.103	0.104	0.108	0.109	0.107	0.138	0.143	0.144	0.12	0.128	0.126	0.086	0.086	0.087
1.5	0.108	0.113	0.114	0.091	0.09	0.09	0.131	0.133	0.132	0.146	0.143	0.144	0.167	0.171	0.162	0.23	0.241	0.24	0.154	0.166	0.16	0.086	0.086	0.086
2	0.111	0.116	0.117	0.095	0.095	0.095	0.181	0.179	0.18	0.197	0.192	0.195	0.209	0.213	0.209	0.27	0.269	0.287	0.176	0.189	0.184	0.086	0.087	0.087
2.5	0.115	0.12	0.121	0.104	0.103	0.103	0.224	0.227	0.224	0.246	0.248	0.249	0.27	0.277	0.263	0.295	0.301	0.303	0.2	0.216	0.21	0.086	0.087	0.087
3	0.117	0.122	0.123	0.113	0.113	0.113	0.289	0.298	0.288	0.303	0.296	0.3	0.312	0.316	0.308	0.319	0.304	0.317	0.222	0.243	0.233	0.087	0.087	0.087
3.5	0.119	0.125	0.128	0.128	0.128	0.129	0.34	0.347	0.327	0.341	0.333	0.346	0.341	0.345	0.339	0.361	0.342	0.364	0.242	0.258	0.258	0.086	0.087	0.086
4	0.123	0.13	0.13	0.153	0.157	0.159	0.376	0.378	0.38	0.364	0.371	0.375	0.369	0.375	0.379	0.376	0.373	0.385	0.273	0.306	0.28	0.087	0.087	0.087
4.5	0.128	0.136	0.135	0.189	0.186	0.188	0.412	0.414	0.393	0.386	0.402	0.395	0.398	0.403	0.403	0.383	0.365	0.372	0.291	0.312	0.314	0.087	0.087	0.087
5	0.133	0.14	0.143	0.202	0.204	0.206	0.444	0.431	0.427	0.417	0.426	0.427	0.437	0.443	0.445	0.405	0.388	0.399	0.345	0.363	0.339	0.088	0.088	0.088
5.5	0.138	0.144	0.147	0.231	0.233	0.229	0.455	0.457	0.466	0.443	0.449	0.453	0.455	0.465	0.472	0.419	0.43	0.427	0.375	0.398	0.376	0.087	0.088	0.087
6	0.143	0.154	0.154	0.273	0.278	0.274	0.489	0.487	0.47	0.464	0.471	0.483	0.479	0.485	0.489	0.439	0.449	0.445	0.391	0.418	0.445	0.088	0.089	0.088
6.5	0.15	0.163	0.161	0.33	0.335	0.316	0.519	0.51	0.487	0.524	0.536	0.511	0.501	0.51	0.521	0.459	0.45	0.456	0.371	0.413	0.439	0.087	0.088	0.087
7	0.159	0.174	0.174	0.344	0.352	0.349	0.514	0.511	0.519	0.518	0.523	0.52	0.541	0.543	0.528	0.482	0.474	0.492	0.383	0.424	0.485	0.087	0.088	0.087
7.5	0.168	0.179	0.18	0.41	0.399	0.408	0.531	0.532	0.528	0.528	0.53	0.532	0.52	0.544	0.542	0.492	0.493	0.489	0.393	0.405	0.477	0.088	0.089	0.088
8	0.174	0.19	0.187	0.428	0.428	0.45	0.538	0.55	0.547	0.553	0.551	0.56	0.532	0.559	0.544	0.495	0.492	0.496	0.397	0.39	0.483	0.088	0.089	0.088
8.5	0.183	0.201	0.199	0.452	0.478	0.469	0.544	0.549	0.564	0.565	0.573	0.581	0.528	0.55	0.558	0.494	0.494	0.499	0.396	0.383	0.487	0.087	0.088	0.087
9	0.199	0.215	0.219	0.487	0.527	0.514	0.554	0.56	0.565	0.573	0.588	0.591	0.532	0.549	0.556	0.508	0.48	0.507	0.394	0.379	0.481	0.088	0.09	0.088
9.5	0.21	0.225	0.226	0.531	0.556	0.531	0.559	0.563	0.569	0.575	0.596	0.604	0.556	0.555	0.565	0.491	0.484	0.511	0.394	0.374	0.47	0.088	0.09	0.088
10	0.222	0.232	0.234	0.548	0.57	0.545	0.568	0.57	0.573	0.561	0.57	0.591	0.535	0.564	0.555	0.495	0.486	0.508	0.392	0.371	0.458	0.088	0.09	0.089
10.5	0.217	0.23	0.23	0.539	0.558	0.565	0.581	0.583	0.577	0.592	0.606	0.618	0.542	0.587	0.592	0.507	0.497	0.505	0.388	0.367	0.447	0.088	0.09	0.089
11	0.23	0.249	0.253	0.569	0.589	0.597	0.583	0.579	0.59	0.603	0.62	0.624	0.553	0.583	0.579	0.511	0.499	0.51	0.378	0.362	0.433	0.088	0.09	0.088
11.5	0.237	0.264	0.265	0.599	0.593	0.615	0.594	0.596	0.6	0.593	0.62	0.623	0.557	0.6	0.603	0.524	0.489	0.511	0.363	0.352	0.406	0.088	0.091	0.089
12	0.258	0.285	0.282	0.598	0.624	0.628	0.589	0.589	0.592	0.631	0.629	0.642	0.548	0.588	0.583	0.514	0.51	0.514	0.348	0.341	0.391	0.087	0.09	0.088
12.5	0.266	0.295	0.294	0.618	0.639	0.656	0.592	0.59	0.601	0.643	0.648	0.652	0.532	0.587	0.584	0.506	0.502	0.508	0.336	0.333	0.386	0.088	0.091	0.089
13	0.292	0.321	0.312	0.633	0.662	0.652	0.598	0.605	0.592	0.634	0.644	0.646	0.512	0.6	0.576	0.511	0.494	0.518	0.322	0.323	0.375	0.087	0.09	0.088
13.5	0.313	0.336	0.329	0.661	0.689	0.672	0.607	0.607	0.581	0.644	0.656	0.652	0.494	0.559	0.571	0.528	0.495	0.529	0.312	0.313	0.367	0.087	0.091	0.088
14	0.315	0.344	0.337	0.685	0.688	0.726	0.594	0.587	0.585	0.634	0.657	0.639	0.495	0.53	0.56	0.505	0.502	0.505	0.303	0.305	0.365	0.088	0.091	0.089
14.5	0.326	0.366	0.357	0.704	0.712	0.726	0.588	0.592	0.589	0.643	0.68	0.655	0.487	0.549	0.562	0.517	0.508	0.528	0.296	0.297	0.363	0.087	0.09	0.088
15	0.366	0.401	0.386	0.713	0.74	0.755	0.581	0.584	0.578	0.649	0.657	0.644	0.488	0.552	0.56	0.519	0.494	0.517	0.289	0.291	0.362	0.087	0.09	0.088
15.5	0.39	0.428	0.417	0.713	0.721	0.741	0.561	0.571	0.574	0.632	0.652	0.634	0.485	0.546	0.556	0.519	0.498	0.514	0.283	0.286	0.364	0.087	0.091	0.089
16	0.359	0.404	0.396	0.706	0.715	0.737	0.554	0.56	0.561	0.626	0.651	0.639	0.48	0.551	0.556	0.521	0.496	0.51	0.276	0.282	0.368	0.086	0.09	0.088
16.5	0.387	0.429	0.421	0.692	0.698	0.727	0.536	0.542	0.555	0.619	0.65	0.633	0.476	0.545	0.553	0.517	0.491	0.506	0.268	0.276	0.365	0.086	0.089	0.087
17	0.418	0.458	0.449	0.76	0.768	0.776	0.522	0.528	0.534	0.616	0.643	0.627	0.469	0.531	0.541	0.52	0.493	0.509	0.261	0.272	0.368	0.087	0.091	0.088
17.5	0.424	0.464	0.445	0.731	0.705	0.745	0.505	0.511	0.523	0.521	0.614	0.596	0.464	0.533	0.541	0.516	0.49	0.507	0.256	0.268	0.373	0.087	0.091	0.088
18	0.45	0.494	0.481	0.735	0.736	0.775	0.488	0.497	0.512	0.511	0.599	0.584	0.461	0.526	0.535	0.514	0.487	0.506	0.249	0.265	0.372	0.087	0.09	0.088
18.5	0.452	0.496	0.474	0.72	0.707	0.738	0.472	0.48	0.5	0.506	0.588	0.574	0.456	0.519	0.524	0.508	0.494	0.504	0.244	0.261	0.372	0.087	0.09	0.088
19	0.485	0.526	0.501	0.725	0.724	0.739	0.458	0.467	0.485	0.504	0.574	0.562	0.45	0.5	0.485	0.509	0.506	0.513	0.239	0.258	0.369	0.087	0.091	0.088
19.5	0.51	0.544	0.504	0.733	0.712	0.74	0.453	0.459	0.474	0.499	0.572	0.553	0.447	0.496	0.479	0.507	0.502	0.513	0.235	0.257	0.367	0.087	0.091	0.088
20	0.506	0.536	0.5	0.733	0.71	0.727	0.447	0.456	0.465	0.497	0.56	0.546	0.439	0.487	0.47	0.505	0.505	0.514	0.232	0.255	0.364	0.087	0.091	0.088
20.5	0.509	0.535	0.5	0.757	0.707	0.746	0.447	0.453	0.459	0.491	0.547	0.502	0.432	0.484	0.47	0.508	0.507	0.52	0.23	0.254	0.362	0.087	0.091	0.088
21	0.511	0.544	0.511	0.721	0.712	0.739	0.444	0.448	0.451	0.489	0.543	0.498	0.425	0.483	0.467	0.498	0.507	0.514	0.228	0.252	0.358	0.086	0.089	0.087
21.5	0.533	0.571	0.543	0.734	0.716	0.734	0.441	0.447	0.449	0.482	0.535	0.489	0.418	0.48	0.463	0.495	0.509	0.513	0.228	0.251	0.356	0.087	0.09	0.088
22	0.545	0.581	0.552	0.761	0.733	0.754	0.439	0.445	0.446	0.488	0.531	0.484	0.421	0.474	0.451	0.492	0.504	0.509	0.227	0.251	0.352	0.086	0.09	0.087
strain 370a
hours	17	17	17	27	27	27	37	37	37	39	39	39	41	41	41	43	43	43	49	49	49	55	55	55
0	0.168	0.174	0.175	0.098	0.093	0.094	0.089	0.089	0.086	0.084	0.085	0.086	0.085	0.086	0.088	0.097	0.097	0.097	0.094	0.096	0.096	0.085	0.086	0.086
0.5	0.13	0.135	0.138	0.093	0.095	0.095	0.09	0.089	0.089	0.086	0.087	0.088	0.089	0.089	0.091	0.112	0.114	0.114	0.107	0.109	0.109	0.086	0.086	0.086
1	0.125	0.132	0.128	0.099	0.101	0.101	0.099	0.098	0.098	0.094	0.095	0.097	0.096	0.094	0.1	0.13	0.134	0.134	0.107	0.109	0.109	0.085	0.087	0.087
1.5	0.138	0.145	0.14	0.111	0.116	0.115	0.129	0.131	0.13	0.119	0.123	0.126	0.108	0.104	0.115	0.153	0.16	0.159	0.102	0.104	0.104	0.086	0.086	0.087
2	0.161	0.166	0.16	0.129	0.136	0.138	0.2	0.213	0.209	0.173	0.184	0.191	0.139	0.125	0.155	0.175	0.179	0.183	0.1	0.102	0.102	0.086	0.087	0.087
2.5	0.182	0.185	0.178	0.159	0.17	0.171	0.331	0.319	0.319	0.256	0.263	0.268	0.191	0.163	0.219	0.196	0.198	0.207	0.099	0.101	0.102	0.086	0.086	0.087
3	0.201	0.204	0.197	0.208	0.223	0.228	0.414	0.408	0.4	0.321	0.326	0.339	0.251	0.217	0.276	0.215	0.215	0.223	0.099	0.101	0.1	0.086	0.087	0.087
3.5	0.231	0.229	0.223	0.295	0.314	0.31	0.417	0.428	0.417	0.387	0.378	0.379	0.314	0.278	0.333	0.231	0.229	0.236	0.097	0.099	0.099	0.085	0.086	0.086
4	0.265	0.265	0.258	0.368	0.369	0.372	0.451	0.473	0.461	0.419	0.419	0.417	0.378	0.35	0.399	0.244	0.249	0.254	0.096	0.099	0.099	0.085	0.086	0.087
4.5	0.303	0.3	0.295	0.44	0.447	0.448	0.508	0.519	0.525	0.451	0.456	0.465	0.413	0.384	0.425	0.254	0.261	0.265	0.096	0.098	0.099	0.085	0.086	0.087
5	0.338	0.335	0.326	0.484	0.494	0.485	0.536	0.554	0.557	0.485	0.485	0.496	0.447	0.43	0.462	0.266	0.273	0.273	0.096	0.098	0.099	0.086	0.086	0.087
5.5	0.396	0.385	0.379	0.538	0.546	0.533	0.579	0.602	0.602	0.549	0.554	0.562	0.484	0.466	0.493	0.274	0.28	0.28	0.097	0.1	0.1	0.086	0.086	0.087
6	0.419	0.414	0.409	0.578	0.569	0.588	0.607	0.639	0.639	0.591	0.593	0.605	0.507	0.49	0.51	0.281	0.282	0.284	0.094	0.096	0.096	0.086	0.087	0.087
6.5	0.476	0.468	0.465	0.618	0.605	0.631	0.65	0.666	0.675	0.62	0.624	0.637	0.529	0.516	0.532	0.282	0.289	0.286	0.095	0.096	0.097	0.086	0.086	0.087
7	0.546	0.54	0.532	0.584	0.596	0.63	0.681	0.719	0.721	0.652	0.652	0.658	0.549	0.534	0.551	0.282	0.293	0.289	0.094	0.096	0.096	0.086	0.087	0.088
7.5	0.58	0.547	0.569	0.639	0.655	0.699	0.691	0.735	0.735	0.673	0.67	0.668	0.57	0.551	0.561	0.283	0.293	0.287	0.094	0.096	0.096	0.086	0.087	0.087
8	0.638	0.619	0.624	0.657	0.667	0.7	0.728	0.754	0.758	0.697	0.694	0.698	0.588	0.571	0.589	0.285	0.293	0.288	0.093	0.096	0.096	0.086	0.087	0.088
8.5	0.675	0.664	0.662	0.671	0.711	0.733	0.736	0.762	0.777	0.733	0.735	0.731	0.606	0.593	0.608	0.314	0.301	0.315	0.094	0.096	0.096	0.086	0.086	0.087
9	0.726	0.712	0.706	0.664	0.685	0.726	0.753	0.777	0.785	0.748	0.748	0.749	0.627	0.613	0.629	0.321	0.339	0.316	0.094	0.097	0.096	0.086	0.087	0.087
9.5	0.753	0.695	0.734	0.654	0.644	0.629	0.755	0.787	0.793	0.766	0.766	0.769	0.646	0.63	0.644	0.317	0.33	0.311	0.094	0.097	0.096	0.086	0.087	0.087
10	0.752	0.705	0.731	0.671	0.672	0.668	0.765	0.81	0.802	0.785	0.789	0.797	0.669	0.645	0.658	0.313	0.322	0.307	0.094	0.097	0.096	0.086	0.087	0.088
10.5	0.798	0.77	0.783	0.7	0.692	0.69	0.774	0.809	0.813	0.818	0.819	0.82	0.687	0.665	0.679	0.309	0.316	0.3	0.094	0.097	0.097	0.086	0.087	0.087
11	0.796	0.769	0.79	0.713	0.712	0.701	0.784	0.824	0.82	0.838	0.839	0.841	0.707	0.685	0.705	0.311	0.322	0.294	0.095	0.097	0.097	0.086	0.087	0.087
11.5	0.83	0.796	0.835	0.7	0.706	0.702	0.78	0.825	0.83	0.85	0.857	0.862	0.726	0.704	0.733	0.307	0.314	0.287	0.092	0.095	0.094	0.086	0.087	0.087
12	0.83	0.791	0.814	0.693	0.7	0.707	0.795	0.841	0.85	0.878	0.877	0.878	0.75	0.716	0.752	0.302	0.308	0.279	0.093	0.096	0.095	0.086	0.087	0.088
12.5	0.887	0.865	0.873	0.688	0.696	0.704	0.809	0.855	0.862	0.896	0.895	0.899	0.765	0.735	0.758	0.296	0.302	0.272	0.093	0.096	0.095	0.086	0.087	0.088
13	0.909	0.894	0.901	0.743	0.715	0.718	0.823	0.865	0.88	0.918	0.908	0.909	0.768	0.754	0.784	0.29	0.298	0.267	0.092	0.096	0.095	0.086	0.087	0.089
13.5	0.926	0.905	0.923	0.75	0.728	0.732	0.833	0.9	0.906	0.929	0.927	0.931	0.777	0.763	0.786	0.286	0.292	0.263	0.092	0.098	0.096	0.086	0.087	0.088
14	0.955	0.926	0.94	0.776	0.761	0.762	0.857	0.91	0.92	0.942	0.942	0.949	0.783	0.766	0.79	0.287	0.291	0.265	0.092	0.096	0.095	0.086	0.087	0.088
14.5	0.979	0.969	0.969	0.765	0.758	0.75	0.865	0.93	0.929	0.949	0.955	0.954	0.79	0.776	0.793	0.283	0.284	0.261	0.092	0.097	0.095	0.086	0.087	0.087
15	0.998	1.002	0.991	0.79	0.779	0.774	0.873	0.928	0.939	0.967	0.968	0.967	0.794	0.782	0.797	0.28	0.278	0.256	0.091	0.096	0.095	0.086	0.087	0.089
15.5	1.014	1.02	1.004	0.808	0.8	0.802	0.873	0.925	0.943	0.98	0.989	0.988	0.797	0.787	0.798	0.275	0.274	0.252	0.092	0.098	0.096	0.086	0.087	0.088
16	1.022	1.033	1.016	0.818	0.812	0.824	0.873	0.933	0.944	0.995	1.01	1.01	0.797	0.786	0.8	0.271	0.27	0.249	0.093	0.098	0.096	0.086	0.087	0.087
16.5	1.022	1.036	1.019	0.839	0.829	0.835	0.879	0.933	0.945	1.007	1.023	1.022	0.794	0.787	0.8	0.268	0.267	0.247	0.092	0.097	0.095	0.086	0.087	0.088
17	1.031	1.046	1.026	0.863	0.845	0.854	0.893	0.938	0.948	1.02	1.037	1.043	0.795	0.79	0.799	0.265	0.264	0.244	0.092	0.097	0.095	0.086	0.087	0.088
17.5	1.039	1.051	1.029	0.884	0.848	0.872	0.9	0.946	0.953	1.027	1.046	1.052	0.793	0.786	0.799	0.266	0.261	0.242	0.092	0.099	0.096	0.086	0.087	0.088
18	1.034	1.048	1.025	0.882	0.837	0.869	0.901	0.951	0.962	1.041	1.058	1.066	0.796	0.791	0.799	0.261	0.258	0.239	0.092	0.098	0.096	0.086	0.087	0.088
18.5	1.031	1.044	1.021	0.891	0.845	0.851	0.907	0.956	0.964	1.055	1.069	1.079	0.796	0.793	0.798	0.258	0.256	0.236	0.093	0.098	0.096	0.086	0.087	0.088
19	1.027	1.046	1.018	0.877	0.824	0.852	0.915	0.971	0.978	1.067	1.079	1.088	0.793	0.79	0.795	0.255	0.256	0.236	0.093	0.097	0.096	0.086	0.088	0.088
19.5	1.025	1.037	1.012	0.878	0.817	0.845	0.93	0.987	0.995	1.079	1.091	1.098	0.795	0.79	0.798	0.252	0.254	0.234	0.094	0.1	0.097	0.086	0.088	0.088
20	1.017	1.035	1.009	0.877	0.806	0.836	0.933	1	1.002	1.085	1.096	1.104	0.789	0.784	0.794	0.252	0.253	0.234	0.093	0.098	0.097	0.086	0.087	0.089
20.5	1.012	1.035	1.008	0.867	0.792	0.821	0.945	1.017	1.027	1.094	1.107	1.111	0.789	0.783	0.792	0.25	0.251	0.233	0.094	0.1	0.097	0.087	0.088	0.089
21	1.011	1.032	1.004	0.854	0.786	0.814	0.97	1.012	1.025	1.099	1.109	1.11	0.787	0.779	0.789	0.246	0.249	0.234	0.095	0.103	0.1	0.086	0.087	0.088
21.5	1.006	1.031	1.001	0.86	0.783	0.808	0.975	1.012	1.033	1.101	1.119	1.11	0.789	0.781	0.791	0.243	0.246	0.226	0.094	0.101	0.099	0.087	0.088	0.089
22	1.004	1.031	0.998	0.855	0.773	0.801	0.987	1.006	1.027	1.104	1.129	1.108	0.783	0.776	0.786	0.244	0.243	0.225	0.095	0.103	0.1	0.087	0.087	0.088
strain 102
hours	17	17	17	27	27	27	37	37	37	39	39	39	41	41	41	43	43	43	49	49	49	55	55	55
0	0.167	0.17	0.167	0.088	0.093	0.095	0.087	0.089	0.087	0.087	0.085	0.084	0.085	0.085	0.085	0.098	0.101	0.098	0.094	0.098	0.1	0.086	0.086	0.086
0.5	0.136	0.142	0.125	0.096	0.101	0.103	0.088	0.089	0.088	0.088	0.088	0.086	0.087	0.087	0.086	0.114	0.118	0.115	0.106	0.111	0.113	0.087	0.087	0.086
1	0.121	0.129	0.134	0.112	0.119	0.122	0.098	0.099	0.096	0.098	0.097	0.094	0.093	0.091	0.09	0.13	0.137	0.134	0.105	0.111	0.114	0.087	0.087	0.086
1.5	0.134	0.145	0.149	0.145	0.155	0.161	0.13	0.135	0.125	0.128	0.123	0.117	0.11	0.102	0.097	0.157	0.166	0.156	0.102	0.107	0.108	0.087	0.087	0.086
2	0.148	0.163	0.164	0.2	0.231	0.253	0.208	0.222	0.205	0.2	0.195	0.177	0.139	0.125	0.112	0.182	0.191	0.178	0.101	0.105	0.107	0.088	0.087	0.086
2.5	0.163	0.18	0.181	0.283	0.328	0.354	0.323	0.328	0.306	0.281	0.276	0.272	0.201	0.166	0.146	0.202	0.214	0.195	0.1	0.105	0.108	0.088	0.087	0.086
3	0.181	0.201	0.199	0.372	0.401	0.382	0.401	0.418	0.408	0.342	0.356	0.339	0.272	0.241	0.209	0.215	0.227	0.212	0.099	0.103	0.107	0.088	0.087	0.086
3.5	0.203	0.223	0.222	0.399	0.412	0.41	0.428	0.44	0.424	0.377	0.382	0.382	0.318	0.298	0.266	0.225	0.238	0.221	0.098	0.102	0.107	0.087	0.087	0.086
4	0.233	0.253	0.251	0.41	0.463	0.469	0.456	0.464	0.457	0.407	0.414	0.408	0.375	0.374	0.357	0.238	0.25	0.229	0.098	0.101	0.107	0.087	0.087	0.086
4.5	0.266	0.288	0.283	0.442	0.506	0.519	0.506	0.531	0.517	0.438	0.461	0.457	0.409	0.428	0.413	0.247	0.258	0.236	0.097	0.101	0.106	0.087	0.087	0.086
5	0.299	0.322	0.318	0.489	0.54	0.554	0.541	0.552	0.544	0.47	0.488	0.482	0.447	0.479	0.462	0.252	0.265	0.244	0.097	0.101	0.109	0.088	0.087	0.086
5.5	0.351	0.391	0.376	0.542	0.597	0.609	0.577	0.594	0.585	0.516	0.55	0.542	0.498	0.523	0.508	0.258	0.271	0.249	0.099	0.102	0.107	0.088	0.087	0.086
6	0.397	0.427	0.423	0.537	0.64	0.651	0.612	0.624	0.624	0.535	0.582	0.576	0.58	0.558	0.541	0.263	0.277	0.253	0.096	0.098	0.104	0.088	0.087	0.086
6.5	0.458	0.476	0.475	0.542	0.671	0.686	0.644	0.648	0.649	0.565	0.611	0.607	0.602	0.605	0.58	0.264	0.281	0.256	0.096	0.098	0.107	0.088	0.087	0.086
7	0.517	0.531	0.525	0.569	0.688	0.696	0.667	0.683	0.686	0.588	0.64	0.637	0.647	0.631	0.612	0.265	0.283	0.259	0.096	0.098	0.108	0.089	0.088	0.086
7.5	0.542	0.565	0.565	0.604	0.712	0.727	0.683	0.705	0.705	0.594	0.669	0.665	0.656	0.66	0.629	0.264	0.283	0.258	0.095	0.097	0.108	0.088	0.087	0.086
8	0.57	0.592	0.572	0.633	0.729	0.746	0.711	0.725	0.721	0.62	0.696	0.685	0.666	0.698	0.661	0.262	0.281	0.257	0.095	0.097	0.107	0.089	0.088	0.087
8.5	0.623	0.662	0.647	0.64	0.771	0.791	0.717	0.743	0.736	0.64	0.718	0.706	0.692	0.706	0.669	0.284	0.283	0.258	0.095	0.098	0.111	0.088	0.087	0.086
9	0.65	0.688	0.673	0.677	0.801	0.816	0.729	0.749	0.741	0.648	0.724	0.719	0.697	0.712	0.671	0.281	0.292	0.258	0.097	0.099	0.111	0.088	0.087	0.086
9.5	0.693	0.705	0.691	0.693	0.835	0.849	0.722	0.756	0.746	0.666	0.743	0.734	0.716	0.718	0.679	0.273	0.294	0.256	0.096	0.099	0.111	0.088	0.087	0.086
10	0.692	0.72	0.709	0.726	0.87	0.882	0.729	0.771	0.762	0.665	0.765	0.754	0.725	0.725	0.686	0.267	0.301	0.257	0.097	0.099	0.109	0.088	0.088	0.087
10.5	0.741	0.74	0.74	0.76	0.912	0.919	0.739	0.783	0.77	0.693	0.799	0.769	0.728	0.735	0.693	0.259	0.306	0.258	0.097	0.1	0.111	0.088	0.088	0.086
11	0.744	0.765	0.756	0.797	0.928	0.935	0.753	0.808	0.786	0.712	0.821	0.798	0.734	0.736	0.692	0.254	0.309	0.264	0.097	0.1	0.108	0.088	0.088	0.086
11.5	0.787	0.818	0.798	0.861	0.952	0.959	0.774	0.822	0.811	0.731	0.838	0.818	0.744	0.74	0.695	0.247	0.302	0.258	0.093	0.095	0.104	0.088	0.088	0.086
12	0.821	0.843	0.824	0.891	0.966	0.972	0.788	0.84	0.825	0.742	0.852	0.831	0.742	0.74	0.696	0.24	0.295	0.257	0.094	0.098	0.11	0.087	0.087	0.086
12.5	0.882	0.888	0.885	0.909	0.963	0.971	0.81	0.86	0.859	0.75	0.868	0.846	0.744	0.745	0.698	0.235	0.285	0.252	0.095	0.098	0.112	0.088	0.088	0.086
13	0.914	0.925	0.917	0.882	0.964	0.973	0.829	0.872	0.879	0.778	0.888	0.862	0.748	0.743	0.699	0.23	0.28	0.246	0.095	0.099	0.108	0.088	0.088	0.087
13.5	0.935	0.935	0.923	0.833	0.972	0.98	0.852	0.891	0.9	0.785	0.901	0.88	0.748	0.741	0.7	0.225	0.271	0.24	0.095	0.101	0.109	0.088	0.088	0.086
14	0.928	0.932	0.921	0.736	0.974	0.977	0.863	0.9	0.914	0.802	0.924	0.899	0.749	0.742	0.702	0.227	0.264	0.239	0.093	0.097	0.105	0.088	0.088	0.087
14.5	0.978	0.979	0.974	0.522	0.975	0.98	0.87	0.911	0.919	0.813	0.925	0.905	0.75	0.74	0.701	0.222	0.256	0.24	0.095	0.1	0.107	0.088	0.088	0.086
15	1.004	1.001	0.997	0.535	0.971	0.976	0.881	0.92	0.933	0.825	0.933	0.915	0.752	0.744	0.701	0.219	0.252	0.248	0.094	0.098	0.109	0.088	0.088	0.087
15.5	1.02	1.026	1.02	0.516	0.972	0.976	0.884	0.925	0.94	0.828	0.936	0.918	0.747	0.739	0.699	0.215	0.246	0.253	0.095	0.101	0.108	0.087	0.088	0.086
16	1.038	1.044	1.039	0.57	0.968	0.971	0.885	0.931	0.948	0.828	0.94	0.923	0.747	0.74	0.7	0.212	0.241	0.248	0.096	0.102	0.108	0.087	0.088	0.086
16.5	1.044	1.046	1.043	0.614	1	0.971	0.887	0.934	0.954	0.825	0.949	0.932	0.748	0.738	0.699	0.21	0.241	0.245	0.095	0.098	0.105	0.087	0.088	0.086
17	1.066	1.07	1.073	0.621	0.998	0.974	0.902	0.936	0.956	0.829	0.957	0.94	0.748	0.737	0.7	0.207	0.238	0.24	0.095	0.1	0.106	0.088	0.089	0.086
17.5	1.088	1.101	1.104	0.63	1.004	0.98	0.91	0.938	0.957	0.832	0.966	0.951	0.746	0.737	0.699	0.204	0.241	0.235	0.098	0.103	0.107	0.088	0.088	0.086
18	1.096	1.11	1.11	0.671	1.013	0.983	0.914	0.938	0.958	0.821	0.968	0.95	0.747	0.74	0.701	0.201	0.237	0.232	0.096	0.1	0.105	0.088	0.089	0.086
18.5	1.103	1.116	1.12	0.694	1.014	0.986	0.932	0.941	0.961	0.824	0.976	0.96	0.743	0.739	0.702	0.2	0.232	0.226	0.097	0.102	0.108	0.087	0.089	0.086
19	1.114	1.123	1.127	0.716	1.017	0.997	0.961	0.944	0.961	0.818	0.981	0.965	0.738	0.738	0.702	0.199	0.232	0.223	0.098	0.102	0.106	0.087	0.089	0.087
19.5	1.118	1.13	1.132	0.753	1.027	1.004	0.983	0.944	0.962	0.823	0.987	0.974	0.735	0.737	0.702	0.197	0.228	0.219	0.103	0.104	0.107	0.088	0.089	0.087
20	1.111	1.128	1.135	0.796	1.021	1.005	0.992	0.946	0.974	0.826	0.994	0.985	0.733	0.735	0.703	0.197	0.228	0.22	0.099	0.101	0.107	0.087	0.089	0.086
20.5	1.116	1.129	1.134	0.715	1.008	1.001	0.993	0.949	0.978	0.826	0.999	0.989	0.73	0.735	0.702	0.196	0.225	0.216	0.101	0.105	0.107	0.087	0.089	0.087
21	1.112	1.131	1.138	0.747	1.01	0.998	1.013	0.951	0.98	0.816	1.002	0.991	0.723	0.733	0.702	0.196	0.227	0.215	0.105	0.104	0.107	0.086	0.088	0.087
21.5	1.117	1.127	1.135	0.737	1.002	0.992	1.024	0.947	0.985	0.824	1.006	0.998	0.711	0.735	0.703	0.195	0.224	0.213	0.1	0.101	0.107	0.088	0.089	0.087
22	1.112	1.128	1.136	0.724	0.999	0.984	1.031	0.946	0.986	0.815	1.007	0.999	0.709	0.732	0.703	0.194	0.222	0.211	0.103	0.105	0.107	0.087	0.088	0.087
strain 111b
hours	17	17	17	27	27	27	37	37	37	39	39	39	41	41	41	43	43	43	49	49	49	55	55	55
0	0.109	0.123	0.107	0.096	0.096	0.095	0.087	0.09	0.089	0.085	0.086	0.086	0.085	0.085	0.086	0.101	0.099	0.097	0.095	0.093	0.091	0.088	0.087	0.088
0.5	0.114	0.116	0.111	0.104	0.105	0.103	0.09	0.091	0.091	0.088	0.088	0.088	0.087	0.087	0.088	0.11	0.11	0.103	0.098	0.097	0.097	0.088	0.088	0.089
1	0.119	0.118	0.114	0.12	0.123	0.12	0.101	0.102	0.102	0.095	0.096	0.095	0.095	0.093	0.094	0.115	0.116	0.106	0.098	0.096	0.095	0.089	0.088	0.089
1.5	0.125	0.127	0.12	0.149	0.158	0.154	0.134	0.139	0.136	0.116	0.118	0.116	0.11	0.107	0.109	0.118	0.122	0.108	0.097	0.095	0.095	0.089	0.087	0.089
2	0.132	0.137	0.124	0.213	0.229	0.219	0.225	0.234	0.23	0.168	0.181	0.173	0.138	0.134	0.135	0.122	0.129	0.107	0.096	0.094	0.094	0.089	0.088	0.089
2.5	0.149	0.15	0.135	0.294	0.286	0.292	0.327	0.325	0.338	0.256	0.251	0.247	0.189	0.182	0.181	0.127	0.135	0.106	0.096	0.093	0.093	0.088	0.088	0.089
3	0.164	0.168	0.148	0.377	0.372	0.374	0.366	0.388	0.393	0.305	0.316	0.311	0.253	0.262	0.268	0.129	0.14	0.107	0.097	0.093	0.093	0.088	0.087	0.089
3.5	0.185	0.185	0.165	0.407	0.396	0.41	0.401	0.425	0.422	0.337	0.358	0.35	0.312	0.323	0.324	0.126	0.144	0.113	0.097	0.093	0.093	0.088	0.087	0.088
4	0.21	0.213	0.188	0.48	0.448	0.446	0.434	0.454	0.446	0.366	0.397	0.387	0.368	0.384	0.384	0.124	0.142	0.122	0.097	0.093	0.093	0.089	0.088	0.089
4.5	0.242	0.24	0.213	0.458	0.483	0.488	0.513	0.528	0.519	0.399	0.437	0.431	0.394	0.413	0.411	0.123	0.148	0.125	0.097	0.093	0.093	0.089	0.088	0.088
5	0.278	0.267	0.241	0.516	0.525	0.515	0.544	0.558	0.546	0.431	0.477	0.474	0.437	0.452	0.455	0.124	0.147	0.133	0.098	0.093	0.093	0.089	0.088	0.089
5.5	0.316	0.315	0.279	0.603	0.597	0.602	0.576	0.581	0.572	0.465	0.523	0.515	0.458	0.474	0.462	0.123	0.144	0.133	0.1	0.093	0.094	0.089	0.088	0.089
6	0.354	0.336	0.306	0.611	0.631	0.645	0.621	0.621	0.618	0.492	0.555	0.551	0.474	0.483	0.465	0.123	0.142	0.144	0.1	0.093	0.093	0.089	0.088	0.089
6.5	0.411	0.388	0.363	0.658	0.678	0.685	0.637	0.651	0.635	0.517	0.582	0.578	0.484	0.498	0.482	0.126	0.143	0.128	0.1	0.093	0.094	0.089	0.088	0.088
7	0.45	0.416	0.403	0.697	0.676	0.691	0.648	0.683	0.67	0.547	0.613	0.609	0.499	0.525	0.507	0.13	0.139	0.14	0.102	0.093	0.094	0.089	0.088	0.089
7.5	0.479	0.429	0.441	0.722	0.759	0.756	0.682	0.7	0.704	0.558	0.643	0.644	0.506	0.531	0.505	0.132	0.138	0.142	0.103	0.093	0.094	0.089	0.088	0.089
8	0.523	0.495	0.502	0.733	0.787	0.779	0.709	0.725	0.727	0.573	0.668	0.662	0.494	0.536	0.508	0.135	0.136	0.147	0.103	0.093	0.094	0.089	0.088	0.089
8.5	0.594	0.506	0.529	0.79	0.799	0.764	0.731	0.752	0.755	0.577	0.693	0.678	0.501	0.546	0.51	0.138	0.133	0.133	0.104	0.093	0.094	0.088	0.088	0.088
9	0.594	0.535	0.567	0.769	0.853	0.843	0.744	0.764	0.762	0.585	0.715	0.691	0.512	0.553	0.524	0.143	0.133	0.136	0.105	0.093	0.095	0.089	0.088	0.089
9.5	0.614	0.561	0.592	0.806	0.903	0.883	0.752	0.781	0.774	0.592	0.733	0.716	0.526	0.558	0.531	0.142	0.134	0.155	0.107	0.093	0.095	0.089	0.088	0.088
10	0.684	0.597	0.592	0.836	0.934	0.911	0.782	0.806	0.796	0.596	0.744	0.726	0.545	0.593	0.567	0.144	0.133	0.148	0.108	0.093	0.095	0.089	0.088	0.089
10.5	0.703	0.638	0.651	0.847	0.957	0.922	0.808	0.82	0.808	0.623	0.762	0.745	0.554	0.616	0.59	0.14	0.133	0.151	0.108	0.094	0.095	0.089	0.088	0.089
11	0.713	0.648	0.649	0.856	0.989	0.938	0.819	0.834	0.828	0.646	0.785	0.771	0.572	0.625	0.599	0.143	0.137	0.154	0.11	0.094	0.096	0.088	0.088	0.088
11.5	0.742	0.681	0.707	0.86	1.02	0.954	0.834	0.847	0.837	0.659	0.789	0.783	0.605	0.648	0.618	0.146	0.137	0.157	0.11	0.094	0.096	0.089	0.088	0.089
12	0.772	0.71	0.725	0.868	1.024	0.959	0.852	0.854	0.846	0.667	0.808	0.803	0.62	0.667	0.633	0.143	0.139	0.155	0.111	0.094	0.096	0.088	0.087	0.088
12.5	0.807	0.724	0.756	0.857	1.037	0.966	0.872	0.874	0.864	0.67	0.816	0.816	0.635	0.675	0.645	0.146	0.141	0.15	0.111	0.094	0.097	0.089	0.088	0.088
13	0.881	0.762	0.824	0.85	1.034	0.963	0.885	0.882	0.876	0.673	0.829	0.827	0.646	0.691	0.654	0.15	0.141	0.15	0.111	0.095	0.097	0.088	0.088	0.089
13.5	0.879	0.752	0.814	0.869	1.043	0.964	0.897	0.91	0.908	0.669	0.83	0.835	0.667	0.707	0.662	0.151	0.142	0.152	0.113	0.094	0.097	0.089	0.088	0.088
14	0.903	0.785	0.866	0.893	1.048	0.97	0.893	0.921	0.916	0.683	0.843	0.85	0.682	0.709	0.669	0.15	0.142	0.151	0.112	0.095	0.097	0.089	0.088	0.088
14.5	0.946	0.81	0.891	0.899	1.051	0.972	0.896	0.924	0.933	0.69	0.846	0.852	0.699	0.718	0.683	0.152	0.143	0.169	0.11	0.095	0.097	0.089	0.088	0.088
15	0.952	0.814	0.922	0.914	1.053	0.972	0.903	0.956	0.949	0.709	0.85	0.856	0.727	0.726	0.695	0.153	0.141	0.187	0.113	0.095	0.097	0.088	0.088	0.088
15.5	0.985	0.834	0.923	0.938	1.053	0.975	0.904	0.967	0.955	0.706	0.848	0.859	0.75	0.734	0.699	0.158	0.141	0.164	0.111	0.095	0.097	0.089	0.088	0.088
16	0.983	0.85	0.971	0.947	1.056	0.977	0.957	0.982	0.976	0.781	0.855	0.867	0.768	0.743	0.722	0.153	0.142	0.171	0.111	0.095	0.097	0.088	0.088	0.088
16.5	0.999	0.869	1.012	0.96	1.06	0.98	1.034	1.026	0.989	0.818	0.862	0.871	0.771	0.744	0.722	0.154	0.142	0.183	0.11	0.095	0.097	0.088	0.088	0.088
17	1.018	0.893	1.022	0.993	1.063	0.987	1.072	1.04	0.996	0.836	0.892	0.874	0.784	0.756	0.726	0.152	0.143	0.165	0.11	0.095	0.098	0.089	0.088	0.088
17.5	1.007	0.881	1.017	1.007	1.07	0.996	1.096	1.062	1.009	0.856	0.914	0.883	0.795	0.762	0.727	0.157	0.144	0.154	0.112	0.095	0.097	0.088	0.088	0.088
18	1.032	0.894	1.041	0.998	1.081	1.002	1.104	1.074	1.017	0.869	0.933	0.89	0.814	0.766	0.739	0.16	0.145	0.156	0.11	0.095	0.097	0.089	0.088	0.088
18.5	1.01	0.867	1.057	1.022	1.074	1.004	1.117	1.084	1.026	0.884	0.942	0.894	0.827	0.785	0.741	0.211	0.145	0.154	0.11	0.095	0.097	0.088	0.088	0.088
19	1.039	0.929	1.065	1.023	1.077	1.012	1.127	1.098	1.038	0.903	0.95	0.899	0.837	0.76	0.741	0.179	0.146	0.181	0.111	0.095	0.097	0.088	0.088	0.089
19.5	1.041	0.985	1.062	1.025	1.082	1.005	1.138	1.11	1.055	0.92	0.953	0.906	0.854	0.757	0.746	0.188	0.145	0.175	0.112	0.096	0.098	0.089	0.088	0.089
20	1.038	0.987	1.055	1.029	1.082	1.004	1.153	1.109	1.08	0.945	0.96	0.915	0.86	0.756	0.739	0.192	0.143	0.161	0.112	0.095	0.098	0.089	0.088	0.089
20.5	1.002	0.959	1.012	1.03	1.072	0.999	1.162	1.111	1.094	0.973	0.963	0.94	0.874	0.762	0.744	0.185	0.143	0.16	0.111	0.096	0.098	0.088	0.088	0.089
21	1.022	0.922	1.031	1.022	1.066	1.004	1.176	1.122	1.118	0.986	0.973	0.976	0.886	0.766	0.744	0.17	0.144	0.187	0.112	0.096	0.099	0.088	0.087	0.088
21.5	1.052	0.978	1.005	1.031	1.06	0.987	1.182	1.123	1.132	0.998	0.979	0.992	0.903	0.765	0.749	0.165	0.143	0.175	0.114	0.096	0.099	0.088	0.089	0.089
22	1.027	0.941	0.992	1.02	1.051	0.977	1.19	1.129	1.147	1.008	0.992	1.007	0.913	0.77	0.749	0.173	0.145	0.166	0.113	0.096	0.098	0.088	0.088	0.088
strain 45
hours	17	17	17	27	27	27	37	37	37	39	39	39	41	41	41	43	43	43	49	49	49	55	55	55
0	0.16	0.16	0.162	0.14	0.141	0.142	0.088	0.088	0.086	0.088	0.086	0.086	0.085	0.085	0.086	0.09	0.087	0.087	0.108	0.107	0.108	0.083	0.084	0.085
0.5	0.192	0.191	0.192	0.128	0.127	0.129	0.088	0.088	0.087	0.089	0.089	0.088	0.086	0.087	0.088	0.09	0.088	0.088	0.138	0.138	0.139	0.085	0.086	0.087
1	0.192	0.189	0.191	0.122	0.12	0.123	0.092	0.092	0.09	0.098	0.097	0.096	0.092	0.093	0.094	0.095	0.093	0.092	0.203	0.205	0.206	0.092	0.092	0.094
1.5	0.189	0.183	0.187	0.118	0.115	0.12	0.103	0.102	0.1	0.125	0.122	0.12	0.106	0.107	0.11	0.118	0.115	0.116	0.234	0.234	0.235	0.103	0.103	0.105
2	0.187	0.179	0.185	0.114	0.11	0.115	0.132	0.132	0.128	0.162	0.161	0.159	0.145	0.146	0.149	0.174	0.169	0.17	0.278	0.277	0.275	0.123	0.124	0.127
2.5	0.184	0.175	0.183	0.11	0.106	0.109	0.159	0.159	0.156	0.186	0.185	0.185	0.174	0.174	0.171	0.215	0.21	0.207	0.309	0.311	0.313	0.146	0.147	0.15
3	0.179	0.169	0.178	0.105	0.105	0.105	0.183	0.185	0.182	0.231	0.223	0.222	0.226	0.227	0.224	0.257	0.251	0.25	0.338	0.338	0.336	0.152	0.156	0.16
3.5	0.177	0.165	0.174	0.105	0.108	0.107	0.222	0.222	0.217	0.258	0.261	0.259	0.244	0.248	0.245	0.301	0.298	0.299	0.36	0.361	0.357	0.167	0.17	0.173
4	0.174	0.161	0.171	0.105	0.111	0.109	0.261	0.26	0.253	0.3	0.298	0.295	0.307	0.3	0.303	0.331	0.331	0.33	0.38	0.391	0.388	0.183	0.191	0.197
4.5	0.172	0.158	0.169	0.107	0.116	0.113	0.31	0.319	0.311	0.335	0.337	0.329	0.322	0.322	0.325	0.342	0.334	0.34	0.385	0.387	0.386	0.209	0.217	0.234
5	0.169	0.155	0.166	0.11	0.123	0.118	0.327	0.328	0.325	0.354	0.363	0.36	0.357	0.359	0.364	0.359	0.359	0.358	0.404	0.406	0.404	0.234	0.251	0.261
5.5	0.169	0.155	0.166	0.116	0.135	0.127	0.373	0.395	0.392	0.364	0.37	0.367	0.386	0.386	0.381	0.38	0.372	0.368	0.428	0.435	0.428	0.277	0.28	0.279
6	0.17	0.156	0.167	0.122	0.151	0.139	0.402	0.422	0.418	0.406	0.423	0.419	0.415	0.41	0.413	0.397	0.385	0.379	0.445	0.446	0.444	0.302	0.305	0.299
6.5	0.169	0.154	0.166	0.131	0.153	0.147	0.443	0.467	0.473	0.443	0.454	0.447	0.459	0.456	0.458	0.423	0.416	0.415	0.463	0.464	0.458	0.298	0.305	0.298
7	0.171	0.157	0.169	0.145	0.159	0.154	0.469	0.495	0.486	0.469	0.475	0.467	0.474	0.469	0.475	0.455	0.458	0.436	0.488	0.489	0.485	0.321	0.329	0.322
7.5	0.17	0.156	0.167	0.148	0.165	0.16	0.511	0.526	0.511	0.492	0.504	0.501	0.514	0.511	0.517	0.487	0.457	0.459	0.506	0.506	0.502	0.318	0.314	0.301
8	0.173	0.158	0.171	0.155	0.175	0.168	0.527	0.552	0.552	0.525	0.533	0.527	0.517	0.519	0.537	0.504	0.486	0.477	0.531	0.531	0.527	0.337	0.329	0.31
8.5	0.177	0.163	0.174	0.158	0.188	0.177	0.57	0.586	0.58	0.553	0.556	0.55	0.565	0.567	0.565	0.52	0.511	0.512	0.566	0.568	0.556	0.351	0.329	0.315
9	0.176	0.162	0.172	0.17	0.205	0.189	0.593	0.606	0.597	0.586	0.593	0.584	0.576	0.575	0.579	0.551	0.544	0.543	0.593	0.601	0.58	0.341	0.327	0.314
9.5	0.178	0.163	0.174	0.18	0.224	0.208	0.623	0.637	0.63	0.607	0.608	0.602	0.588	0.59	0.6	0.588	0.558	0.572	0.62	0.634	0.609	0.352	0.337	0.325
10	0.176	0.162	0.172	0.195	0.25	0.224	0.661	0.669	0.661	0.641	0.641	0.632	0.636	0.632	0.631	0.621	0.586	0.601	0.665	0.686	0.656	0.349	0.339	0.33
10.5	0.177	0.163	0.173	0.213	0.279	0.242	0.677	0.687	0.679	0.646	0.647	0.642	0.659	0.666	0.667	0.639	0.6	0.62	0.715	0.747	0.703	0.354	0.348	0.337
11	0.177	0.164	0.174	0.232	0.311	0.278	0.709	0.722	0.715	0.671	0.672	0.663	0.682	0.679	0.676	0.674	0.64	0.662	0.765	0.802	0.758	0.36	0.357	0.343
11.5	0.179	0.167	0.176	0.249	0.322	0.302	0.73	0.745	0.735	0.706	0.713	0.705	0.695	0.696	0.696	0.694	0.657	0.676	0.82	0.865	0.818	0.371	0.36	0.344
12	0.178	0.165	0.176	0.285	0.358	0.327	0.748	0.752	0.738	0.714	0.716	0.714	0.725	0.719	0.727	0.715	0.672	0.689	0.894	0.939	0.888	0.371	0.368	0.36
12.5	0.177	0.164	0.175	0.322	0.426	0.375	0.765	0.792	0.77	0.73	0.742	0.727	0.755	0.74	0.753	0.756	0.699	0.719	0.962	0.993	0.949	0.387	0.397	0.384
13	0.18	0.168	0.178	0.392	0.471	0.441	0.786	0.802	0.795	0.753	0.755	0.754	0.79	0.775	0.793	0.785	0.711	0.738	1.03	1.051	1.01	0.413	0.412	0.39
13.5	0.179	0.168	0.178	0.382	0.432	0.428	0.819	0.829	0.832	0.758	0.768	0.766	0.816	0.806	0.82	0.808	0.73	0.777	1.09	1.108	1.069	0.408	0.41	0.392
14	0.182	0.17	0.182	0.423	0.512	0.487	0.839	0.86	0.854	0.793	0.802	0.79	0.843	0.835	0.845	0.842	0.754	0.796	1.149	1.167	1.125	0.422	0.422	0.406
14.5	0.182	0.169	0.181	0.431	0.489	0.472	0.861	0.884	0.878	0.8	0.824	0.821	0.859	0.858	0.866	0.866	0.772	0.82	1.195	1.214	1.173	0.421	0.425	0.426
15	0.183	0.172	0.183	0.456	0.552	0.536	0.878	0.912	0.895	0.813	0.868	0.86	0.887	0.869	0.884	0.897	0.801	0.852	1.228	1.249	1.139	0.443	0.445	0.451
15.5	0.183	0.171	0.183	0.472	0.584	0.55	0.89	0.956	0.939	0.826	0.872	0.871	0.895	0.895	0.907	0.921	0.821	0.876	1.252	1.27	1.159	0.434	0.434	0.449
16	0.184	0.173	0.183	0.529	0.601	0.577	0.917	0.984	0.973	0.848	0.916	0.909	0.926	0.92	0.931	0.946	0.847	0.905	1.284	1.302	1.251	0.425	0.441	0.449
16.5	0.185	0.172	0.184	0.551	0.625	0.588	0.936	1.005	1	0.873	0.934	0.933	0.951	0.941	0.946	0.968	0.868	0.92	1.296	1.313	1.163	0.427	0.443	0.446
17	0.184	0.172	0.182	0.571	0.656	0.632	0.971	1.029	1.011	0.9	0.958	0.952	0.951	0.939	0.941	0.994	0.895	0.951	1.309	1.32	1.147	0.429	0.436	0.449
17.5	0.185	0.174	0.184	0.596	0.679	0.664	0.975	1.056	1.042	0.906	0.966	0.961	0.976	0.963	0.962	1.002	0.913	0.965	1.316	1.33	1.145	0.417	0.429	0.443
18	0.187	0.175	0.185	0.629	0.704	0.668	0.975	1.072	1.056	0.919	0.983	0.976	0.996	0.988	0.977	1.021	0.936	0.989	1.331	1.337	1.114	0.416	0.429	0.436
18.5	0.187	0.176	0.186	0.651	0.743	0.71	0.993	1.088	1.074	0.937	0.994	0.982	1.016	1.006	0.991	1.026	0.956	0.994	1.342	1.343	1.117	0.407	0.428	0.43
19	0.189	0.176	0.187	0.678	0.754	0.724	1.019	1.084	1.068	0.96	1.007	1.002	1.015	1.014	0.998	1.049	0.976	1.01	1.33	1.332	1.083	0.409	0.424	0.422
19.5	0.19	0.179	0.189	0.71	0.787	0.741	1.026	1.116	1.108	0.967	1.026	1.015	1.035	1.027	1.016	1.048	0.986	1.019	1.326	1.326	1.075	0.394	0.412	0.408
20	0.19	0.18	0.189	0.726	0.817	0.76	1.021	1.123	1.113	0.983	1.041	1.031	1.034	1.026	1.011	1.032	0.986	1.014	1.335	1.323	1.102	0.389	0.405	0.396
20.5	0.19	0.18	0.19	0.755	0.839	0.783	1.067	1.136	1.141	0.987	1.049	1.037	1.048	1.045	1.028	1.044	0.996	1.02	1.314	1.296	1.084	0.385	0.399	0.387
21	0.19	0.18	0.19	0.766	0.865	0.781	1.075	1.148	1.137	1.006	1.052	1.043	1.052	1.048	1.038	1.043	1.001	1.022	1.317	1.294	1.099	0.389	0.404	0.381
21.5	0.193	0.182	0.19	0.793	0.895	0.809	1.089	1.15	1.154	1.012	1.047	1.031	1.06	1.055	1.049	1.042	0.999	1.019	1.307	1.28	1.095	0.389	0.398	0.363
22	0.192	0.182	0.189	0.798	0.91	0.815	1.113	1.164	1.169	1.025	1.058	1.036	1.044	1.055	1.049	1.047	1.003	1.023	1.299	1.266	1.079	0.378	0.387	0.35
strain 2
hours	17	17	17	27	27	27	37	37	37	39	39	39	41	41	41	43	43	43	49	49	49	55	55	55
0	0.13	0.137	0.139	0.131	0.134	0.133	0.109	0.113	0.114	0.092	0.098	0.099	0.09	0.089	0.089	0.086	0.087	0.087	0.104	0.107	0.107	0.088	0.088	0.089
0.5	0.097	0.155	0.171	0.129	0.128	0.13	0.115	0.115	0.117	0.097	0.11	0.111	0.095	0.095	0.094	0.085	0.087	0.087	0.144	0.147	0.146	0.088	0.088	0.09
1	0.089	0.093	0.123	0.125	0.126	0.128	0.143	0.14	0.142	0.121	0.155	0.154	0.117	0.118	0.115	0.087	0.087	0.088	0.195	0.202	0.201	0.09	0.091	0.092
1.5	0.089	0.09	0.094	0.123	0.125	0.125	0.17	0.173	0.177	0.162	0.188	0.189	0.172	0.173	0.172	0.093	0.093	0.094	0.237	0.241	0.235	0.091	0.093	0.095
2	0.089	0.093	0.096	0.122	0.124	0.125	0.2	0.191	0.199	0.195	0.217	0.211	0.213	0.213	0.21	0.121	0.12	0.123	0.276	0.284	0.284	0.095	0.099	0.101
2.5	0.089	0.092	0.093	0.12	0.122	0.123	0.249	0.23	0.23	0.221	0.249	0.256	0.25	0.249	0.246	0.171	0.17	0.173	0.306	0.308	0.309	0.101	0.106	0.109
3	0.089	0.091	0.093	0.118	0.121	0.122	0.292	0.267	0.274	0.264	0.303	0.308	0.321	0.286	0.286	0.216	0.218	0.222	0.33	0.343	0.339	0.113	0.12	0.125
3.5	0.089	0.092	0.094	0.117	0.12	0.122	0.312	0.301	0.322	0.323	0.358	0.357	0.309	0.316	0.305	0.25	0.253	0.27	0.351	0.36	0.359	0.133	0.138	0.144
4	0.088	0.092	0.094	0.116	0.119	0.121	0.333	0.334	0.333	0.358	0.385	0.378	0.329	0.345	0.335	0.279	0.293	0.305	0.369	0.379	0.38	0.157	0.158	0.164
4.5	0.089	0.092	0.094	0.114	0.118	0.12	0.359	0.366	0.368	0.382	0.417	0.411	0.366	0.361	0.36	0.322	0.334	0.345	0.391	0.398	0.399	0.167	0.169	0.171
5	0.089	0.092	0.1	0.113	0.117	0.119	0.388	0.38	0.37	0.423	0.455	0.453	0.381	0.425	0.412	0.356	0.363	0.374	0.41	0.417	0.416	0.182	0.183	0.184
5.5	0.088	0.091	0.099	0.111	0.116	0.119	0.422	0.408	0.405	0.461	0.491	0.487	0.405	0.455	0.444	0.381	0.398	0.409	0.434	0.444	0.443	0.187	0.185	0.185
6	0.089	0.092	0.1	0.111	0.115	0.118	0.446	0.448	0.438	0.491	0.519	0.509	0.459	0.485	0.476	0.416	0.435	0.445	0.456	0.464	0.472	0.2	0.194	0.191
6.5	0.089	0.093	0.1	0.109	0.114	0.117	0.473	0.46	0.464	0.527	0.56	0.553	0.461	0.505	0.5	0.454	0.461	0.478	0.489	0.497	0.498	0.207	0.188	0.186
7	0.089	0.09	0.095	0.108	0.113	0.117	0.503	0.499	0.499	0.556	0.587	0.582	0.471	0.509	0.508	0.49	0.503	0.517	0.522	0.528	0.535	0.205	0.188	0.184
7.5	0.089	0.091	0.097	0.107	0.112	0.115	0.524	0.526	0.519	0.596	0.624	0.615	0.531	0.552	0.541	0.524	0.541	0.562	0.56	0.571	0.585	0.2	0.18	0.182
8	0.089	0.092	0.1	0.106	0.111	0.115	0.556	0.558	0.559	0.624	0.655	0.647	0.554	0.565	0.57	0.563	0.586	0.603	0.599	0.612	0.623	0.205	0.178	0.185
8.5	0.089	0.092	0.099	0.105	0.11	0.114	0.59	0.593	0.583	0.657	0.682	0.686	0.558	0.577	0.575	0.597	0.622	0.64	0.633	0.662	0.675	0.23	0.206	0.206
9	0.089	0.092	0.099	0.103	0.109	0.113	0.607	0.608	0.594	0.69	0.723	0.717	0.567	0.59	0.577	0.631	0.662	0.673	0.667	0.689	0.701	0.235	0.199	0.19
9.5	0.089	0.091	0.097	0.102	0.109	0.113	0.646	0.636	0.633	0.72	0.748	0.751	0.589	0.623	0.614	0.663	0.688	0.704	0.729	0.753	0.757	0.233	0.201	0.188
10	0.089	0.092	0.096	0.101	0.108	0.112	0.667	0.657	0.662	0.745	0.781	0.777	0.622	0.651	0.642	0.696	0.723	0.75	0.782	0.812	0.799	0.245	0.201	0.184
10.5	0.089	0.092	0.098	0.1	0.107	0.111	0.681	0.676	0.678	0.767	0.803	0.807	0.642	0.667	0.662	0.735	0.753	0.773	0.837	0.894	0.867	0.27	0.227	0.195
11	0.089	0.092	0.099	0.098	0.105	0.11	0.713	0.703	0.702	0.781	0.831	0.84	0.641	0.678	0.666	0.754	0.782	0.795	0.882	0.896	0.882	0.262	0.225	0.199
11.5	0.089	0.092	0.098	0.097	0.103	0.11	0.724	0.724	0.73	0.813	0.853	0.871	0.682	0.705	0.697	0.78	0.802	0.824	0.927	0.964	0.924	0.25	0.221	0.19
12	0.089	0.092	0.098	0.096	0.102	0.109	0.751	0.755	0.76	0.819	0.879	0.895	0.691	0.728	0.718	0.804	0.841	0.853	0.974	1.027	0.975	0.262	0.249	0.221
12.5	0.089	0.092	0.098	0.096	0.101	0.109	0.765	0.77	0.775	0.84	0.908	0.93	0.718	0.754	0.732	0.825	0.849	0.871	1.006	1.05	0.999	0.255	0.236	0.212
13	0.09	0.093	0.099	0.097	0.099	0.107	0.79	0.811	0.815	0.834	0.919	0.934	0.726	0.773	0.755	0.837	0.883	0.876	1.041	1.147	1.051	0.252	0.239	0.217
13.5	0.089	0.092	0.095	0.098	0.097	0.106	0.814	0.836	0.843	0.855	0.942	0.964	0.747	0.788	0.774	0.847	0.883	0.898	1.071	1.141	1.076	0.264	0.243	0.22
14	0.09	0.092	0.095	0.101	0.097	0.105	0.829	0.848	0.859	0.858	0.938	0.951	0.775	0.82	0.791	0.85	0.876	0.881	1.09	1.165	1.093	0.239	0.241	0.22
14.5	0.089	0.092	0.095	0.103	0.096	0.104	0.843	0.863	0.866	0.856	0.941	0.96	0.793	0.837	0.807	0.82	0.893	0.888	1.104	1.158	1.106	0.243	0.248	0.227
15	0.089	0.092	0.095	0.107	0.097	0.101	0.862	0.892	0.904	0.859	0.953	0.975	0.809	0.854	0.83	0.818	0.894	0.895	1.128	1.165	1.118	0.24	0.246	0.224
15.5	0.089	0.092	0.097	0.113	0.098	0.099	0.894	0.915	0.92	0.869	0.966	0.984	0.819	0.871	0.846	0.8	0.9	0.895	1.143	1.178	1.132	0.25	0.248	0.232
16	0.089	0.092	0.098	0.124	0.1	0.097	0.913	0.949	0.955	0.876	0.974	0.997	0.838	0.896	0.872	0.788	0.907	0.913	1.16	1.182	1.137	0.262	0.242	0.218
16.5	0.089	0.092	0.096	0.138	0.104	0.097	0.944	0.973	0.971	0.888	0.972	1.005	0.863	0.916	0.891	0.793	0.917	0.913	1.179	1.195	1.149	0.267	0.253	0.237
17	0.089	0.091	0.096	0.143	0.109	0.097	0.959	0.988	0.986	0.918	1.001	1.042	0.89	0.936	0.907	0.805	0.927	0.936	1.189	1.195	1.165	0.26	0.264	0.236
17.5	0.09	0.093	0.095	0.149	0.117	0.098	0.973	1.007	1.007	0.938	1.022	1.07	0.91	0.951	0.925	0.815	0.932	0.933	1.182	1.176	1.154	0.25	0.267	0.247
18	0.089	0.092	0.095	0.159	0.129	0.1	0.988	1.025	1.021	0.973	1.037	1.085	0.927	0.963	0.938	0.816	0.936	0.958	1.2	1.2	1.17	0.238	0.26	0.256
18.5	0.089	0.092	0.096	0.17	0.141	0.102	1.004	1.043	1.031	1.005	1.071	1.116	0.94	0.969	0.954	0.828	0.954	0.965	1.204	1.191	1.164	0.235	0.259	0.258
19	0.09	0.092	0.096	0.185	0.147	0.105	1.014	1.052	1.041	1.037	1.104	1.162	0.955	0.977	0.96	0.85	0.968	0.98	1.197	1.191	1.157	0.243	0.249	0.232
19.5	0.09	0.092	0.096	0.204	0.154	0.111	1.021	1.072	1.056	1.073	1.126	1.183	0.951	0.98	0.962	0.861	0.983	0.984	1.189	1.177	1.141	0.23	0.253	0.236
20	0.089	0.092	0.096	0.226	0.163	0.119	1.018	1.081	1.068	1.111	1.157	1.203	0.971	0.998	0.971	0.874	0.983	0.996	1.196	1.179	1.157	0.24	0.26	0.249
20.5	0.089	0.092	0.095	0.269	0.179	0.134	1.018	1.091	1.083	1.146	1.19	1.216	0.974	1.004	0.984	0.879	0.985	1.018	1.198	1.162	1.148	0.235	0.252	0.231
21	0.089	0.091	0.095	0.316	0.197	0.143	1.021	1.1	1.091	1.18	1.212	1.235	0.978	1.008	0.989	0.887	0.993	1.029	1.201	1.153	1.147	0.233	0.26	0.254
21.5	0.089	0.092	0.095	0.344	0.214	0.149	1.024	1.105	1.097	1.216	1.23	1.25	0.964	1.003	0.986	0.907	0.998	1.021	1.194	1.137	1.136	0.236	0.236	0.262
22	0.089	0.09	0.093	0.36	0.244	0.157	1.028	1.105	1.097	1.252	1.246	1.264	0.971	0.997	0.985	0.919	1.004	1.025	1.179	1.142	1.137	0.24	0.242	0.257
strain 30
hours	17	17	17	27	27	27	37	37	37	39	39	39	41	41	41	43	43	43	49	49	49	55	55	55
0	0.162	0.16	0.166	0.139	0.14	0.14	0.089	0.09	0.088	0.087	0.087	0.087	0.086	0.086	0.086	0.086	0.087	0.088	0.1	0.1	0.098	0.086	0.084	0.085
0.5	0.194	0.193	0.198	0.131	0.132	0.131	0.092	0.093	0.091	0.092	0.093	0.092	0.088	0.089	0.088	0.087	0.086	0.088	0.123	0.124	0.121	0.087	0.086	0.087
1	0.193	0.192	0.197	0.12	0.122	0.12	0.105	0.107	0.104	0.112	0.114	0.11	0.104	0.104	0.1	0.087	0.087	0.089	0.194	0.194	0.182	0.087	0.086	0.087
1.5	0.19	0.188	0.192	0.11	0.112	0.109	0.146	0.151	0.145	0.168	0.17	0.164	0.163	0.164	0.152	0.093	0.092	0.095	0.248	0.247	0.237	0.087	0.086	0.087
2	0.185	0.184	0.187	0.103	0.105	0.103	0.191	0.205	0.197	0.229	0.238	0.229	0.227	0.225	0.216	0.121	0.119	0.122	0.293	0.293	0.287	0.087	0.086	0.087
2.5	0.181	0.18	0.182	0.104	0.101	0.101	0.255	0.265	0.258	0.274	0.281	0.27	0.276	0.279	0.268	0.193	0.195	0.195	0.32	0.323	0.318	0.087	0.086	0.087
3	0.175	0.174	0.176	0.103	0.101	0.103	0.311	0.324	0.319	0.311	0.323	0.312	0.309	0.313	0.311	0.235	0.235	0.232	0.351	0.353	0.348	0.087	0.086	0.087
3.5	0.169	0.168	0.17	0.106	0.104	0.107	0.359	0.357	0.354	0.344	0.351	0.343	0.352	0.335	0.339	0.279	0.28	0.274	0.376	0.378	0.373	0.087	0.085	0.087
4	0.163	0.162	0.163	0.111	0.107	0.115	0.383	0.377	0.366	0.367	0.363	0.362	0.381	0.365	0.366	0.321	0.309	0.312	0.395	0.397	0.392	0.087	0.086	0.087
4.5	0.158	0.158	0.159	0.119	0.113	0.126	0.43	0.422	0.415	0.401	0.407	0.388	0.423	0.401	0.387	0.341	0.349	0.348	0.412	0.414	0.412	0.087	0.086	0.086
5	0.152	0.153	0.154	0.133	0.125	0.146	0.429	0.431	0.426	0.433	0.431	0.429	0.438	0.43	0.415	0.37	0.371	0.381	0.428	0.429	0.424	0.087	0.086	0.087
5.5	0.151	0.152	0.153	0.156	0.144	0.176	0.454	0.46	0.456	0.445	0.44	0.434	0.443	0.44	0.427	0.386	0.386	0.388	0.453	0.451	0.439	0.087	0.086	0.087
6	0.151	0.151	0.151	0.182	0.169	0.186	0.483	0.494	0.486	0.461	0.472	0.457	0.455	0.468	0.445	0.41	0.407	0.406	0.456	0.453	0.448	0.088	0.086	0.087
6.5	0.148	0.15	0.15	0.193	0.184	0.214	0.503	0.525	0.509	0.482	0.481	0.488	0.471	0.468	0.46	0.431	0.435	0.438	0.46	0.461	0.459	0.087	0.086	0.086
7	0.155	0.155	0.155	0.221	0.208	0.259	0.524	0.503	0.511	0.511	0.504	0.509	0.488	0.467	0.469	0.454	0.45	0.454	0.476	0.472	0.468	0.087	0.086	0.087
7.5	0.154	0.156	0.155	0.261	0.241	0.297	0.561	0.519	0.512	0.511	0.518	0.493	0.508	0.479	0.483	0.474	0.482	0.479	0.502	0.496	0.476	0.088	0.086	0.087
8	0.159	0.162	0.161	0.33	0.304	0.367	0.552	0.534	0.534	0.519	0.55	0.504	0.519	0.494	0.496	0.494	0.498	0.496	0.518	0.51	0.489	0.088	0.086	0.087
8.5	0.17	0.171	0.171	0.376	0.353	0.411	0.563	0.535	0.542	0.529	0.554	0.522	0.533	0.512	0.51	0.527	0.531	0.528	0.51	0.508	0.485	0.087	0.086	0.087
9	0.172	0.175	0.174	0.38	0.39	0.407	0.564	0.551	0.555	0.545	0.575	0.542	0.546	0.521	0.528	0.574	0.584	0.571	0.54	0.542	0.505	0.088	0.086	0.087
9.5	0.181	0.183	0.182	0.43	0.428	0.44	0.551	0.558	0.564	0.553	0.593	0.549	0.553	0.544	0.544	0.614	0.623	0.607	0.566	0.563	0.523	0.088	0.086	0.086
10	0.182	0.184	0.185	0.435	0.43	0.467	0.56	0.588	0.581	0.561	0.616	0.573	0.571	0.549	0.55	0.662	0.679	0.656	0.573	0.57	0.501	0.088	0.086	0.087
10.5	0.185	0.187	0.188	0.477	0.446	0.492	0.59	0.602	0.603	0.573	0.638	0.588	0.59	0.567	0.567	0.701	0.721	0.698	0.586	0.584	0.505	0.088	0.086	0.087
11	0.195	0.195	0.196	0.518	0.493	0.506	0.607	0.628	0.627	0.594	0.652	0.608	0.604	0.592	0.588	0.739	0.751	0.742	0.618	0.612	0.551	0.088	0.086	0.087
11.5	0.206	0.207	0.206	0.532	0.509	0.528	0.616	0.649	0.646	0.61	0.679	0.641	0.622	0.602	0.604	0.756	0.782	0.762	0.635	0.627	0.543	0.088	0.086	0.087
12	0.211	0.215	0.214	0.546	0.542	0.536	0.629	0.678	0.685	0.619	0.686	0.653	0.633	0.624	0.626	0.79	0.804	0.794	0.623	0.623	0.541	0.088	0.086	0.087
12.5	0.218	0.222	0.221	0.555	0.542	0.56	0.65	0.697	0.687	0.648	0.7	0.662	0.652	0.645	0.644	0.804	0.82	0.814	0.646	0.637	0.606	0.088	0.086	0.087
13	0.236	0.236	0.235	0.562	0.547	0.564	0.662	0.72	0.693	0.664	0.725	0.69	0.671	0.668	0.654	0.817	0.825	0.825	0.659	0.651	0.608	0.088	0.086	0.088
13.5	0.248	0.245	0.245	0.568	0.564	0.586	0.693	0.734	0.716	0.674	0.729	0.708	0.695	0.706	0.68	0.824	0.828	0.828	0.67	0.655	0.62	0.088	0.086	0.087
14	0.253	0.255	0.256	0.587	0.589	0.603	0.709	0.734	0.758	0.69	0.735	0.718	0.707	0.706	0.706	0.84	0.84	0.843	0.668	0.656	0.658	0.088	0.086	0.087
14.5	0.253	0.255	0.257	0.598	0.602	0.619	0.724	0.764	0.762	0.693	0.76	0.736	0.715	0.719	0.724	0.847	0.842	0.846	0.682	0.671	0.67	0.088	0.086	0.087
15	0.262	0.263	0.263	0.609	0.613	0.644	0.735	0.789	0.781	0.731	0.769	0.749	0.717	0.724	0.741	0.858	0.851	0.858	0.683	0.675	0.675	0.088	0.086	0.087
15.5	0.27	0.271	0.271	0.62	0.619	0.652	0.745	0.79	0.782	0.747	0.789	0.761	0.755	0.742	0.741	0.857	0.845	0.852	0.688	0.686	0.689	0.089	0.086	0.087
16	0.282	0.282	0.28	0.625	0.639	0.664	0.754	0.801	0.808	0.758	0.802	0.784	0.749	0.754	0.759	0.86	0.846	0.854	0.694	0.692	0.682	0.088	0.086	0.087
16.5	0.291	0.294	0.293	0.64	0.652	0.669	0.765	0.819	0.821	0.758	0.788	0.779	0.762	0.751	0.768	0.863	0.846	0.854	0.699	0.697	0.688	0.088	0.086	0.087
17	0.303	0.302	0.299	0.653	0.663	0.675	0.779	0.827	0.827	0.779	0.801	0.785	0.772	0.777	0.775	0.861	0.84	0.85	0.697	0.699	0.712	0.089	0.086	0.087
17.5	0.317	0.314	0.314	0.661	0.669	0.67	0.798	0.835	0.836	0.773	0.802	0.78	0.778	0.772	0.765	0.852	0.832	0.843	0.688	0.701	0.708	0.089	0.086	0.087
18	0.336	0.331	0.328	0.675	0.682	0.696	0.773	0.828	0.839	0.776	0.794	0.786	0.786	0.779	0.786	0.858	0.827	0.84	0.706	0.715	0.681	0.089	0.086	0.087
18.5	0.354	0.347	0.342	0.682	0.694	0.707	0.775	0.84	0.838	0.781	0.799	0.795	0.774	0.775	0.776	0.853	0.822	0.834	0.716	0.732	0.642	0.089	0.086	0.087
19	0.367	0.363	0.358	0.703	0.719	0.712	0.764	0.849	0.844	0.778	0.792	0.792	0.773	0.776	0.775	0.855	0.823	0.836	0.708	0.724	0.677	0.089	0.087	0.087
19.5	0.4	0.382	0.376	0.71	0.717	0.732	0.773	0.843	0.847	0.782	0.795	0.791	0.76	0.762	0.771	0.848	0.814	0.826	0.717	0.732	0.642	0.089	0.087	0.087
20	0.435	0.433	0.417	0.726	0.727	0.742	0.771	0.848	0.843	0.79	0.797	0.794	0.771	0.756	0.763	0.84	0.805	0.819	0.712	0.727	0.64	0.089	0.086	0.087
20.5	0.441	0.453	0.445	0.73	0.74	0.751	0.796	0.839	0.842	0.793	0.786	0.783	0.76	0.759	0.763	0.842	0.804	0.814	0.701	0.713	0.674	0.089	0.086	0.087
21	0.45	0.45	0.455	0.737	0.738	0.766	0.8	0.855	0.849	0.79	0.788	0.785	0.763	0.75	0.755	0.834	0.798	0.808	0.703	0.709	0.657	0.089	0.086	0.086
21.5	0.468	0.459	0.465	0.753	0.753	0.788	0.794	0.838	0.827	0.784	0.783	0.776	0.752	0.759	0.751	0.825	0.787	0.797	0.693	0.703	0.656	0.089	0.086	0.087
22	0.504	0.496	0.47	0.769	0.777	0.818	0.803	0.838	0.825	0.789	0.776	0.774	0.754	0.732	0.75	0.837	0.796	0.803	0.694	0.704	0.642	0.089	0.086	0.087
strain 28
hours	17	17	17	27	27	27	37	37	37	39	39	39	41	41	41	43	43	43	49	49	49	55	55	55
0	0.15	0.159	0.161	0.133	0.14	0.137	0.09	0.091	0.091	0.087	0.087	0.087	0.089	0.089	0.089	0.089	0.087	0.087	0.155	0.151	0.146	0.089	0.089	0.091
0.5	0.178	0.19	0.197	0.195	0.168	0.191	0.106	0.112	0.101	0.1	0.105	0.092	0.093	0.096	0.092	0.092	0.091	0.09	0.257	0.261	0.252	0.093	0.094	0.095
1	0.119	0.193	0.197	0.218	0.193	0.218	0.096	0.097	0.098	0.086	0.086	0.088	0.096	0.094	0.105	0.11	0.109	0.109	0.25	0.254	0.246	0.092	0.092	0.093
1.5	0.092	0.191	0.193	0.267	0.254	0.277	0.143	0.144	0.157	0.09	0.09	0.096	0.122	0.12	0.168	0.176	0.174	0.171	0.225	0.243	0.221	0.091	0.091	0.093
2	0.093	0.181	0.186	0.326	0.32	0.343	0.23	0.235	0.237	0.115	0.118	0.12	0.201	0.199	0.266	0.276	0.269	0.262	0.228	0.256	0.217	0.091	0.091	0.094
2.5	0.091	0.162	0.181	0.403	0.395	0.428	0.324	0.309	0.328	0.19	0.157	0.196	0.28	0.278	0.324	0.338	0.348	0.333	0.217	0.262	0.222	0.09	0.091	0.092
3	0.091	0.153	0.175	0.47	0.453	0.457	0.386	0.387	0.403	0.27	0.259	0.211	0.339	0.337	0.374	0.397	0.414	0.413	0.203	0.253	0.223	0.091	0.091	0.092
3.5	0.091	0.144	0.168	0.543	0.51	0.507	0.445	0.443	0.457	0.326	0.243	0.263	0.382	0.38	0.416	0.426	0.458	0.449	0.189	0.242	0.212	0.09	0.091	0.091
4	0.091	0.137	0.162	0.623	0.58	0.58	0.496	0.492	0.5	0.413	0.321	0.315	0.43	0.429	0.462	0.457	0.496	0.494	0.172	0.234	0.211	0.091	0.09	0.092
4.5	0.092	0.128	0.159	0.637	0.623	0.611	0.544	0.543	0.553	0.457	0.397	0.367	0.466	0.464	0.494	0.508	0.543	0.55	0.15	0.213	0.189	0.09	0.09	0.092
5	0.091	0.116	0.153	0.687	0.644	0.696	0.581	0.583	0.591	0.486	0.438	0.428	0.497	0.499	0.522	0.529	0.59	0.599	0.142	0.209	0.186	0.09	0.09	0.092
5.5	0.091	0.116	0.152	0.742	0.71	0.722	0.603	0.609	0.615	0.523	0.491	0.493	0.525	0.527	0.549	0.541	0.615	0.638	0.135	0.208	0.185	0.09	0.091	0.092
6	0.091	0.115	0.151	0.801	0.786	0.777	0.636	0.628	0.643	0.551	0.533	0.534	0.553	0.564	0.579	0.553	0.628	0.651	0.131	0.208	0.185	0.09	0.091	0.092
6.5	0.092	0.109	0.15	0.826	0.816	0.815	0.684	0.674	0.69	0.584	0.563	0.56	0.584	0.595	0.607	0.596	0.688	0.7	0.13	0.202	0.179	0.09	0.09	0.091
7	0.092	0.115	0.153	0.867	0.839	0.834	0.721	0.711	0.718	0.613	0.585	0.591	0.619	0.624	0.641	0.647	0.738	0.734	0.123	0.199	0.175	0.091	0.091	0.092
7.5	0.092	0.104	0.151	0.904	0.9	0.895	0.78	0.769	0.776	0.658	0.63	0.646	0.636	0.637	0.661	0.644	0.782	0.764	0.121	0.197	0.175	0.09	0.09	0.092
8	0.092	0.116	0.154	0.928	0.927	0.921	0.825	0.818	0.824	0.689	0.664	0.684	0.662	0.657	0.679	0.642	0.811	0.802	0.121	0.196	0.174	0.09	0.09	0.092
8.5	0.093	0.124	0.16	0.966	0.956	0.952	0.861	0.855	0.858	0.717	0.697	0.722	0.689	0.69	0.707	0.625	0.818	0.797	0.12	0.189	0.17	0.09	0.09	0.091
9	0.093	0.122	0.161	0.982	0.974	0.968	0.884	0.886	0.884	0.762	0.734	0.742	0.704	0.705	0.722	0.583	0.836	0.781	0.12	0.189	0.17	0.09	0.09	0.091
9.5	0.094	0.17	0.165	1.003	0.998	1.006	0.903	0.912	0.907	0.787	0.768	0.773	0.736	0.738	0.743	0.565	0.857	0.753	0.118	0.188	0.169	0.09	0.09	0.091
10	0.095	0.165	0.215	1.009	1.003	1.008	0.923	0.937	0.932	0.827	0.805	0.811	0.74	0.744	0.739	0.579	0.862	0.727	0.115	0.184	0.166	0.09	0.09	0.092
10.5	0.096	0.149	0.167	1.029	1.028	1.032	0.945	0.954	0.949	0.85	0.824	0.84	0.727	0.744	0.731	0.586	0.877	0.745	0.127	0.182	0.163	0.09	0.09	0.092
11	0.098	0.166	0.197	1.04	1.035	1.044	0.958	0.968	0.964	0.866	0.848	0.857	0.732	0.753	0.736	0.659	0.913	0.783	0.117	0.18	0.162	0.09	0.09	0.091
11.5	0.1	0.171	0.179	1.059	1.053	1.066	0.973	0.981	0.976	0.885	0.868	0.878	0.741	0.763	0.749	0.679	0.926	0.799	0.124	0.177	0.158	0.09	0.09	0.092
12	0.125	0.173	0.177	1.068	1.066	1.08	0.992	0.994	0.986	0.905	0.887	0.9	0.755	0.777	0.771	0.628	0.975	0.824	0.126	0.171	0.152	0.09	0.09	0.092
12.5	0.106	0.15	0.187	1.078	1.073	1.079	1.002	1.015	1.006	0.918	0.905	0.916	0.765	0.785	0.779	0.622	0.974	0.837	0.121	0.172	0.152	0.09	0.09	0.091
13	0.11	0.211	0.203	1.09	1.08	1.071	1.008	1.023	1.007	0.933	0.912	0.927	0.767	0.798	0.782	0.632	0.988	0.856	0.119	0.169	0.15	0.09	0.09	0.092
13.5	0.115	0.16	0.217	1.103	1.092	1.078	1.015	1.028	1.012	0.938	0.922	0.938	0.778	0.805	0.787	0.666	0.989	0.86	0.119	0.168	0.15	0.09	0.09	0.092
14	0.128	0.177	0.242	1.099	1.093	1.086	1.02	1.033	1.018	0.966	0.94	0.963	0.779	0.805	0.796	0.69	0.988	0.862	0.119	0.169	0.15	0.09	0.09	0.091
14.5	0.16	0.205	0.27	1.11	1.097	1.084	1.025	1.043	1.028	0.963	0.943	0.968	0.78	0.805	0.8	0.714	0.989	0.866	0.118	0.166	0.149	0.09	0.09	0.091
15	0.143	0.274	0.284	1.117	1.102	1.09	1.036	1.054	1.037	0.97	0.951	0.979	0.787	0.813	0.809	0.744	0.998	0.873	0.119	0.166	0.149	0.091	0.09	0.094
15.5	0.169	0.329	0.302	1.119	1.102	1.096	1.043	1.062	1.046	0.971	0.954	0.983	0.795	0.821	0.82	0.763	1	0.881	0.116	0.165	0.149	0.09	0.09	0.091
16	0.209	0.393	0.329	1.124	1.103	1.099	1.056	1.074	1.057	0.98	0.959	0.995	0.806	0.839	0.843	0.772	1.002	0.882	0.117	0.164	0.147	0.09	0.09	0.091
16.5	0.23	0.338	0.372	1.127	1.109	1.102	1.064	1.08	1.072	0.999	0.971	1.002	0.822	0.864	0.865	0.783	1.004	0.883	0.118	0.163	0.146	0.09	0.09	0.091
17	0.261	0.33	0.415	1.13	1.112	1.101	1.088	1.1	1.087	1.009	0.985	1.013	0.849	0.896	0.893	0.795	1.006	0.887	0.129	0.161	0.145	0.09	0.09	0.092
17.5	0.293	0.383	0.452	1.135	1.119	1.106	1.101	1.115	1.104	1.017	0.996	1.017	0.877	0.905	0.907	0.803	1.008	0.889	0.121	0.159	0.144	0.089	0.09	0.091
18	0.337	0.419	0.508	1.138	1.121	1.109	1.118	1.122	1.108	1.026	1.007	1.03	0.9	0.929	0.927	0.816	1.011	0.895	0.129	0.158	0.141	0.09	0.09	0.091
18.5	0.374	0.46	0.59	1.143	1.121	1.118	1.122	1.14	1.126	1.037	1.015	1.035	0.903	0.936	0.931	0.833	1.013	0.894	0.136	0.154	0.133	0.089	0.09	0.091
19	0.426	0.502	0.606	1.147	1.131	1.123	1.135	1.141	1.133	1.057	1.035	1.059	0.912	0.956	0.935	0.853	1.018	0.896	0.135	0.152	0.131	0.09	0.09	0.092
19.5	0.462	0.603	0.682	1.163	1.134	1.131	1.137	1.147	1.139	1.058	1.035	1.059	0.923	0.968	0.944	0.864	1.034	0.899	0.147	0.15	0.129	0.09	0.09	0.092
20	0.494	0.669	0.732	1.158	1.143	1.14	1.146	1.158	1.139	1.078	1.057	1.081	0.932	0.978	0.956	0.873	1.032	0.896	0.143	0.148	0.128	0.09	0.09	0.091
20.5	0.524	0.683	0.76	1.171	1.149	1.14	1.159	1.166	1.15	1.079	1.06	1.08	0.94	0.986	0.964	0.881	1.032	0.896	0.143	0.149	0.128	0.089	0.09	0.091
21	0.579	0.737	0.8	1.173	1.156	1.147	1.17	1.178	1.161	1.085	1.065	1.087	0.946	0.99	0.972	0.895	1.035	0.897	0.142	0.149	0.128	0.089	0.09	0.091
21.5	0.656	0.784	0.839	1.176	1.16	1.15	1.172	1.183	1.159	1.094	1.076	1.097	0.956	1	0.983	0.902	1.032	0.9	0.14	0.148	0.128	0.09	0.09	0.092
22	0.684	0.816	0.899	1.176	1.17	1.163	1.175	1.183	1.165	1.099	1.078	1.102	0.969	1.01	0.993	0.918	1.035	0.904	0.143	0.147	0.128	0.09	0.09	0.091
strain 11
hours	17	17	17	27	27	27	37	37	37	39	39	39	41	41	41	43	43	43	49	49	49	55	55	55
0	0.135	0.148	0.155	0.091	0.1	0.1	0.087	0.086	0.085	0.088	0.087	0.086	0.086	0.086	0.086	0.088	0.086	0.088	0.165	0.155	0.153	0.085	0.086	0.085
0.5	0.125	0.177	0.184	0.091	0.103	0.103	0.085	0.085	0.084	0.096	0.096	0.096	0.091	0.091	0.091	0.089	0.087	0.088	0.264	0.273	0.277	0.088	0.089	0.089
1	0.096	0.165	0.179	0.092	0.1	0.102	0.088	0.088	0.087	0.136	0.136	0.131	0.11	0.114	0.115	0.09	0.088	0.089	0.26	0.255	0.261	0.088	0.089	0.089
1.5	0.096	0.148	0.169	0.093	0.092	0.097	0.099	0.098	0.097	0.241	0.242	0.222	0.188	0.2	0.204	0.093	0.092	0.094	0.245	0.249	0.256	0.088	0.089	0.089
2	0.098	0.124	0.16	0.094	0.094	0.094	0.147	0.145	0.141	0.307	0.307	0.315	0.259	0.276	0.272	0.108	0.102	0.106	0.237	0.255	0.26	0.088	0.089	0.09
2.5	0.099	0.099	0.15	0.096	0.095	0.095	0.276	0.282	0.28	0.371	0.368	0.375	0.325	0.336	0.336	0.146	0.143	0.152	0.238	0.255	0.253	0.088	0.089	0.089
3	0.1	0.101	0.131	0.1	0.098	0.099	0.371	0.371	0.372	0.385	0.376	0.442	0.353	0.369	0.374	0.227	0.221	0.227	0.235	0.253	0.253	0.088	0.089	0.09
3.5	0.103	0.103	0.102	0.104	0.103	0.105	0.396	0.418	0.393	0.45	0.442	0.508	0.384	0.397	0.397	0.289	0.287	0.296	0.223	0.255	0.247	0.087	0.089	0.089
4	0.105	0.107	0.105	0.111	0.109	0.112	0.485	0.525	0.499	0.479	0.47	0.545	0.405	0.424	0.433	0.322	0.336	0.337	0.218	0.247	0.238	0.088	0.089	0.09
4.5	0.109	0.11	0.114	0.121	0.117	0.121	0.533	0.563	0.539	0.495	0.488	0.58	0.45	0.483	0.491	0.34	0.37	0.372	0.21	0.243	0.236	0.087	0.089	0.089
5	0.114	0.115	0.114	0.134	0.132	0.135	0.575	0.598	0.586	0.507	0.504	0.595	0.485	0.503	0.509	0.377	0.401	0.408	0.207	0.242	0.233	0.088	0.089	0.09
5.5	0.119	0.124	0.12	0.15	0.147	0.154	0.583	0.607	0.625	0.56	0.546	0.624	0.532	0.544	0.551	0.406	0.422	0.431	0.2	0.236	0.229	0.087	0.089	0.09
6	0.128	0.134	0.139	0.176	0.171	0.179	0.635	0.655	0.67	0.57	0.541	0.623	0.545	0.553	0.547	0.44	0.453	0.46	0.206	0.233	0.227	0.087	0.089	0.09
6.5	0.138	0.141	0.141	0.206	0.195	0.21	0.66	0.66	0.67	0.612	0.571	0.662	0.572	0.589	0.575	0.46	0.473	0.493	0.192	0.226	0.221	0.087	0.089	0.089
7	0.151	0.156	0.166	0.251	0.242	0.265	0.704	0.702	0.721	0.645	0.581	0.668	0.611	0.613	0.611	0.489	0.545	0.532	0.184	0.226	0.222	0.087	0.089	0.09
7.5	0.168	0.173	0.172	0.329	0.301	0.328	0.723	0.709	0.747	0.668	0.61	0.681	0.639	0.638	0.638	0.498	0.562	0.561	0.183	0.222	0.221	0.087	0.089	0.089
8	0.188	0.201	0.209	0.369	0.362	0.39	0.719	0.717	0.727	0.683	0.64	0.696	0.667	0.659	0.66	0.522	0.592	0.59	0.18	0.221	0.22	0.088	0.089	0.09
8.5	0.208	0.229	0.237	0.455	0.426	0.457	0.737	0.748	0.744	0.705	0.676	0.725	0.697	0.68	0.686	0.542	0.61	0.613	0.179	0.217	0.217	0.087	0.089	0.089
9	0.233	0.242	0.251	0.48	0.459	0.48	0.756	0.772	0.761	0.725	0.697	0.743	0.717	0.696	0.708	0.555	0.632	0.632	0.178	0.216	0.214	0.087	0.089	0.09
9.5	0.263	0.281	0.29	0.497	0.527	0.527	0.772	0.79	0.77	0.744	0.714	0.756	0.739	0.714	0.727	0.574	0.657	0.656	0.175	0.214	0.212	0.087	0.088	0.089
10	0.3	0.31	0.311	0.535	0.539	0.557	0.793	0.807	0.789	0.769	0.739	0.779	0.758	0.729	0.751	0.579	0.676	0.672	0.174	0.213	0.211	0.088	0.089	0.09
10.5	0.347	0.37	0.369	0.567	0.594	0.584	0.803	0.833	0.809	0.789	0.763	0.797	0.781	0.744	0.782	0.584	0.685	0.681	0.174	0.21	0.21	0.088	0.089	0.089
11	0.396	0.409	0.421	0.587	0.602	0.621	0.809	0.867	0.83	0.807	0.786	0.82	0.8	0.759	0.799	0.567	0.692	0.693	0.174	0.208	0.209	0.088	0.088	0.089
11.5	0.436	0.473	0.497	0.616	0.635	0.642	0.829	0.887	0.86	0.835	0.809	0.841	0.826	0.776	0.812	0.571	0.699	0.691	0.174	0.207	0.208	0.088	0.089	0.09
12	0.455	0.486	0.515	0.649	0.654	0.656	0.843	0.904	0.885	0.856	0.822	0.853	0.839	0.794	0.837	0.589	0.701	0.698	0.176	0.204	0.206	0.088	0.089	0.089
12.5	0.494	0.526	0.53	0.667	0.692	0.701	0.865	0.916	0.904	0.875	0.846	0.87	0.852	0.81	0.847	0.604	0.72	0.707	0.174	0.202	0.204	0.089	0.089	0.089
13	0.522	0.584	0.567	0.685	0.715	0.716	0.895	0.94	0.935	0.9	0.873	0.895	0.87	0.819	0.86	0.624	0.729	0.722	0.174	0.202	0.204	0.089	0.089	0.09
13.5	0.552	0.587	0.619	0.696	0.746	0.756	0.913	0.959	0.955	0.895	0.878	0.895	0.883	0.838	0.869	0.626	0.738	0.729	0.176	0.201	0.203	0.089	0.089	0.09
14	0.573	0.634	0.612	0.726	0.8	0.821	0.925	0.971	0.963	0.919	0.887	0.913	0.889	0.843	0.885	0.638	0.739	0.739	0.176	0.2	0.202	0.089	0.089	0.09
14.5	0.583	0.603	0.612	0.789	0.858	0.866	0.941	0.996	0.972	0.927	0.897	0.92	0.898	0.847	0.888	0.646	0.749	0.749	0.174	0.199	0.2	0.089	0.089	0.09
15	0.609	0.656	0.613	0.811	0.919	0.916	0.939	0.988	0.969	0.929	0.897	0.923	0.905	0.857	0.901	0.659	0.755	0.757	0.171	0.198	0.199	0.089	0.089	0.09
15.5	0.65	0.7	0.641	0.83	0.967	0.95	0.937	1.014	1.002	0.944	0.912	0.939	0.915	0.87	0.906	0.663	0.76	0.766	0.173	0.196	0.197	0.089	0.089	0.09
16	0.688	0.774	0.655	0.859	0.987	0.97	0.972	1.024	1.015	0.95	0.911	0.936	0.926	0.88	0.922	0.671	0.764	0.773	0.176	0.195	0.196	0.089	0.089	0.09
16.5	0.682	0.849	0.661	0.885	1.008	0.989	0.959	1.02	1.002	0.96	0.926	0.946	0.941	0.897	0.939	0.677	0.765	0.782	0.176	0.194	0.196	0.089	0.089	0.09
17	0.718	0.863	0.647	0.906	1.027	1.015	0.981	1.028	1.014	0.971	0.937	0.959	0.945	0.899	0.949	0.681	0.77	0.785	0.175	0.194	0.196	0.09	0.089	0.09
17.5	0.74	0.907	0.662	0.921	1.045	1.036	0.991	1.047	1.024	0.978	0.948	0.975	0.964	0.908	0.954	0.685	0.767	0.785	0.183	0.192	0.194	0.089	0.089	0.09
18	0.748	0.944	0.657	0.935	1.054	1.047	0.996	1.045	1.034	0.991	0.963	0.987	0.962	0.914	0.949	0.688	0.767	0.784	0.183	0.192	0.195	0.09	0.089	0.09
18.5	0.757	0.956	0.657	0.948	1.062	1.047	1.004	1.052	1.046	0.991	0.963	0.987	0.964	0.916	0.958	0.693	0.77	0.785	0.184	0.19	0.196	0.089	0.089	0.09
19	0.759	0.976	0.676	0.97	1.077	1.07	1.015	1.055	1.059	1.008	0.976	0.997	0.973	0.92	0.982	0.705	0.774	0.789	0.186	0.189	0.195	0.09	0.09	0.09
19.5	0.766	0.996	0.691	0.979	1.085	1.081	1.033	1.064	1.066	1.011	0.979	1	0.978	0.928	0.991	0.715	0.777	0.788	0.189	0.187	0.194	0.09	0.09	0.09
20	0.776	1.005	0.708	0.989	1.095	1.077	1.042	1.071	1.078	1.015	0.985	1.006	0.992	0.934	1.003	0.715	0.77	0.787	0.2	0.187	0.194	0.09	0.09	0.09
20.5	0.777	1.005	0.709	0.991	1.099	1.076	1.058	1.08	1.087	1.015	0.987	1.005	1.003	0.941	1.01	0.718	0.766	0.787	0.198	0.185	0.191	0.09	0.09	0.09
21	0.781	1.006	0.716	0.995	1.101	1.085	1.07	1.087	1.093	1.02	0.995	1.006	1.01	0.949	1.019	0.729	0.765	0.787	0.194	0.185	0.191	0.089	0.089	0.09
21.5	0.788	1.009	0.718	1.016	1.105	1.082	1.07	1.093	1.101	1.02	0.997	1.009	1.007	0.953	1.023	0.734	0.761	0.785	0.19	0.185	0.19	0.09	0.09	0.091
22	0.793	1.016	0.715	1.027	1.107	1.092	1.076	1.096	1.108	1.024	0.994	1.009	1.014	0.958	1.03	0.739	0.758	0.782	0.197	0.184	0.19	0.089	0.09	0.09
strain 51
hours	17	17	17	27	27	27	37	37	37	39	39	39	41	41	41	43	43	43	49	49	49	55	55	55
0	0.161	0.158	0.157	0.145	0.145	0.15	0.09	0.089	0.088	0.087	0.088	0.088	0.085	0.086	0.086	0.086	0.087	0.086	0.135	0.134	0.124	0.087	0.086	0.085
0.5	0.191	0.19	0.19	0.165	0.166	0.171	0.098	0.091	0.092	0.094	0.096	0.096	0.094	0.093	0.093	0.09	0.089	0.09	0.215	0.21	0.185	0.088	0.088	0.087
1	0.19	0.188	0.189	0.214	0.215	0.224	0.141	0.141	0.16	0.146	0.137	0.144	0.138	0.131	0.122	0.102	0.103	0.104	0.201	0.194	0.168	0.087	0.087	0.086
1.5	0.187	0.185	0.185	0.278	0.281	0.291	0.243	0.22	0.225	0.233	0.267	0.234	0.202	0.207	0.214	0.131	0.13	0.13	0.176	0.172	0.151	0.087	0.087	0.085
2	0.183	0.182	0.183	0.347	0.353	0.367	0.255	0.283	0.287	0.276	0.443	0.363	0.307	0.276	0.299	0.207	0.209	0.206	0.158	0.157	0.141	0.087	0.086	0.085
2.5	0.179	0.179	0.179	0.404	0.415	0.432	0.489	0.412	0.333	0.347	0.31	0.376	0.244	0.379	0.296	0.267	0.242	0.275	0.15	0.149	0.133	0.086	0.086	0.085
3	0.175	0.175	0.175	0.458	0.456	0.493	0.276	0.471	0.366	0.405	0.325	0.36	0.303	0.438	0.318	0.309	0.318	0.336	0.138	0.137	0.126	0.086	0.085	0.084
3.5	0.17	0.172	0.173	0.514	0.503	0.529	0.424	0.512	0.421	0.558	0.525	0.604	0.418	0.575	0.459	0.345	0.342	0.384	0.132	0.131	0.122	0.086	0.085	0.084
4	0.166	0.17	0.169	0.554	0.544	0.566	0.49	0.612	0.49	0.621	0.646	0.641	0.522	0.644	0.492	0.403	0.38	0.433	0.128	0.128	0.12	0.086	0.085	0.084
4.5	0.165	0.168	0.168	0.62	0.617	0.633	0.538	0.66	0.573	0.59	0.589	0.658	0.621	0.679	0.58	0.424	0.431	0.467	0.124	0.127	0.117	0.086	0.085	0.084
5	0.162	0.165	0.165	0.635	0.619	0.652	0.597	0.648	0.599	0.571	0.585	0.689	0.663	0.709	0.622	0.466	0.469	0.503	0.124	0.129	0.116	0.086	0.085	0.084
5.5	0.162	0.166	0.166	0.668	0.659	0.683	0.638	0.675	0.629	0.605	0.628	0.694	0.686	0.717	0.674	0.498	0.506	0.544	0.123	0.136	0.114	0.086	0.085	0.084
6	0.162	0.167	0.167	0.662	0.677	0.691	0.704	0.686	0.672	0.62	0.653	0.719	0.715	0.698	0.652	0.515	0.531	0.573	0.127	0.145	0.122	0.086	0.085	0.084
6.5	0.161	0.166	0.166	0.708	0.684	0.713	0.723	0.726	0.683	0.653	0.682	0.741	0.748	0.72	0.679	0.545	0.553	0.6	0.122	0.141	0.128	0.086	0.085	0.084
7	0.165	0.169	0.168	0.71	0.709	0.737	0.755	0.785	0.725	0.681	0.707	0.759	0.772	0.743	0.696	0.577	0.572	0.629	0.126	0.151	0.135	0.086	0.085	0.084
7.5	0.163	0.168	0.168	0.734	0.712	0.743	0.781	0.806	0.754	0.709	0.724	0.772	0.8	0.768	0.722	0.616	0.606	0.659	0.128	0.183	0.136	0.086	0.085	0.084
8	0.166	0.171	0.171	0.774	0.755	0.762	0.795	0.814	0.764	0.742	0.747	0.793	0.823	0.79	0.742	0.65	0.632	0.694	0.128	0.209	0.136	0.086	0.085	0.085
8.5	0.17	0.174	0.174	0.816	0.805	0.813	0.822	0.841	0.784	0.775	0.767	0.807	0.844	0.807	0.764	0.691	0.666	0.732	0.13	0.238	0.139	0.086	0.085	0.084
9	0.17	0.174	0.173	0.801	0.791	0.803	0.835	0.861	0.809	0.776	0.776	0.817	0.852	0.817	0.772	0.711	0.692	0.75	0.133	0.247	0.147	0.086	0.085	0.084
9.5	0.171	0.175	0.175	0.835	0.834	0.843	0.854	0.876	0.824	0.802	0.788	0.822	0.87	0.832	0.789	0.74	0.715	0.767	0.134	0.253	0.167	0.086	0.085	0.084
10	0.17	0.174	0.175	0.846	0.843	0.848	0.884	0.915	0.838	0.807	0.797	0.836	0.899	0.85	0.807	0.748	0.723	0.784	0.134	0.265	0.178	0.086	0.086	0.085
10.5	0.172	0.176	0.176	0.859	0.859	0.87	0.876	0.938	0.875	0.824	0.809	0.847	0.92	0.869	0.826	0.771	0.73	0.789	0.136	0.277	0.19	0.086	0.086	0.085
11	0.173	0.178	0.179	0.875	0.873	0.877	0.906	0.958	0.88	0.839	0.824	0.856	0.931	0.878	0.838	0.807	0.749	0.804	0.139	0.282	0.204	0.086	0.086	0.084
11.5	0.177	0.181	0.182	0.898	0.898	0.911	0.906	0.948	0.876	0.852	0.836	0.867	0.943	0.888	0.85	0.816	0.749	0.809	0.139	0.285	0.215	0.086	0.086	0.085
12	0.177	0.182	0.183	0.897	0.9	0.91	0.925	0.954	0.894	0.871	0.853	0.882	0.953	0.902	0.863	0.834	0.752	0.811	0.139	0.288	0.216	0.086	0.086	0.085
12.5	0.178	0.184	0.185	0.898	0.904	0.912	0.943	0.974	0.907	0.883	0.865	0.893	0.961	0.909	0.876	0.838	0.755	0.818	0.141	0.288	0.229	0.086	0.086	0.085
13	0.184	0.19	0.192	0.903	0.911	0.913	0.962	0.973	0.924	0.895	0.879	0.905	0.973	0.919	0.883	0.841	0.767	0.82	0.141	0.291	0.291	0.086	0.086	0.085
13.5	0.186	0.193	0.195	0.918	0.92	0.924	0.975	0.99	0.945	0.904	0.889	0.915	0.984	0.931	0.9	0.834	0.777	0.814	0.142	0.29	0.276	0.087	0.087	0.086
14	0.192	0.201	0.205	0.921	0.921	0.926	0.993	1.001	0.961	0.921	0.906	0.929	0.995	0.938	0.909	0.841	0.785	0.817	0.144	0.29	0.278	0.087	0.087	0.086
14.5	0.197	0.208	0.213	0.939	0.929	0.939	1.001	1.01	0.978	0.927	0.911	0.934	1.002	0.954	0.918	0.831	0.796	0.812	0.144	0.292	0.291	0.086	0.087	0.086
15	0.206	0.218	0.226	0.94	0.95	0.953	1.014	1.024	0.992	0.934	0.924	0.943	1.019	0.958	0.925	0.827	0.817	0.812	0.144	0.292	0.293	0.087	0.087	0.086
15.5	0.213	0.231	0.241	0.94	0.947	0.959	1.022	1.033	1.006	0.939	0.927	0.946	1.027	0.962	0.932	0.822	0.817	0.807	0.145	0.291	0.29	0.087	0.087	0.086
16	0.226	0.248	0.258	0.954	0.951	0.971	1.028	1.039	1.016	0.943	0.943	0.952	1.031	0.966	0.934	0.824	0.819	0.804	0.145	0.293	0.29	0.086	0.086	0.086
16.5	0.217	0.262	0.274	0.963	0.964	0.976	1.039	1.051	1.029	0.946	0.945	0.958	1.033	0.964	0.939	0.82	0.828	0.806	0.146	0.293	0.289	0.086	0.086	0.086
17	0.222	0.279	0.291	0.965	0.976	0.986	1.045	1.055	1.041	0.955	0.955	0.969	1.046	0.966	0.943	0.822	0.839	0.803	0.147	0.293	0.291	0.087	0.086	0.086
17.5	0.257	0.325	0.321	0.963	0.971	0.987	1.053	1.063	1.047	0.958	0.96	0.972	1.043	0.966	0.95	0.824	0.85	0.803	0.147	0.292	0.29	0.087	0.086	0.086
18	0.289	0.321	0.348	0.979	0.998	0.993	1.047	1.064	1.047	0.966	0.962	0.977	1.041	0.969	0.953	0.829	0.857	0.8	0.147	0.292	0.29	0.087	0.086	0.086
18.5	0.317	0.358	0.37	0.981	1.005	1.004	1.053	1.073	1.052	0.961	0.968	0.982	1.037	0.981	0.962	0.831	0.862	0.798	0.146	0.291	0.288	0.087	0.086	0.086
19	0.343	0.374	0.385	0.981	0.997	1.001	1.062	1.069	1.062	0.964	0.97	0.984	1.057	0.974	0.951	0.837	0.874	0.805	0.147	0.289	0.29	0.087	0.087	0.086
19.5	0.392	0.409	0.413	0.998	1.013	1.013	1.066	1.09	1.077	0.965	0.973	0.985	1.063	0.967	0.948	0.844	0.879	0.797	0.145	0.288	0.287	0.087	0.087	0.086
20	0.428	0.446	0.441	1.013	1.019	1.024	1.074	1.107	1.094	0.97	0.974	0.989	1.072	0.959	0.949	0.841	0.884	0.806	0.145	0.286	0.287	0.087	0.086	0.086
20.5	0.454	0.486	0.468	1.027	1.018	1.033	1.086	1.116	1.1	0.963	0.979	0.988	1.077	0.96	0.942	0.84	0.894	0.806	0.146	0.285	0.287	0.087	0.086	0.086
21	0.479	0.525	0.507	1.034	1.024	1.039	1.078	1.126	1.105	0.974	0.977	0.991	1.081	0.955	0.938	0.843	0.9	0.809	0.147	0.285	0.287	0.086	0.086	0.086
21.5	0.496	0.543	0.544	1.047	1.033	1.047	1.096	1.139	1.115	0.975	0.979	0.99	1.082	0.969	0.935	0.842	0.906	0.809	0.147	0.284	0.286	0.087	0.086	0.086
22	0.522	0.561	0.576	1.047	1.039	1.042	1.103	1.149	1.124	0.972	0.982	0.985	1.084	0.963	0.931	0.845	0.915	0.811	0.147	0.284	0.286	0.087	0.086	0.086

## Sheet: Table 3
Data for figure 4. Calculated Doubling times (Fig. 3 and Fig. 4) from O.D. reads in Supplem. Table 2.
strain 21
	Slope		(doubling time) -1
Temperature (°C)	y		y
17	1.07228		0.201403
27	1.21255		0.556154
37	1.31398		0.788042
39	1.28945		0.73366
41	1.29149		0.738224
43	1.28791		0.730182
49	1.22814		0.593054
55	1.03054		0.0868202
strain 90
	slope		(doubling time) -1
Temperature	y		y
17	1.21716		0.567156
27	1.34698		0.859638
37	1.39592		0.962636
39	1.38987		0.950092
41	1.38401		0.937897
43	1.35887		0.884984
49	1.08009		0.222355
55	1.07263		0.202347
strain 427
	slope		(doubling time) -1
Temperature	y		y
17	1.07077		0.19733
27	1.21942		0.572498
37	1.29595		0.748132
39	1.26571		0.680025
41	1.28296		0.719076
43	1.25939		0.665532
49	1.24317		0.628033
55	1.02853		0.0811952
strain PY79
	slope		(doubling time) -1
Temperature	y		y
17	1.15746		0.422
27	1.30596		0.77037
37	1.36286		0.893457
39	1.36508		0.89813
41	1.38106		0.931738
43	1.37277		0.91433
49	1.30294		0.763661
55	1.06114		0.171254
strain 370a
	slope		(doubling time) -1
Temperature	y		y
17	1.30694		0.772522
27	1.43834		1.04902
37	1.50468		1.17915
39	1.47384		1.1194
41	1.43409		1.04049
43	1.2757		0.702715
49	1.12491		0.33969
55	1.10585		0.290365
strain 102
	slope		(doubling time) -1
Temperature	y		y
17	1.30499		0.768215
27	1.47017		1.11213
37	1.50376		1.17739
39	1.47308		1.11784
41	1.47068		1.11313
43	1.26448		0.677194
49	1.13492		0.36525
55	1.10808		0.296182
strain 111b
	slope		(doubling time) -1
Temperature	y		y
17	1.31081		0.781033
27	1.45338		1.07904
37	1.48986		1.1506
39	1.44657		1.06544
41	1.4299		1.03202
43	1.1786		0.474021
49	1.1101		0.301437
55	1.10208		0.28051
strain 45
	slope		(doubling time) -1
Temperature	y		y
17	1.06014		0.168551
27	1.20177		0.530382
37	1.29594		0.748137
39	1.29809		0.752933
41	1.31272		0.785287
43	1.31388		0.787826
49	1.32821		0.819119
55	1.22363		0.582463
strain 2
	slope		(doubling time) -1
Temperature	y		y
17	1.02334		0.0663048
27	1.12701		0.342931
37	1.24229		0.626112
39	1.30287		0.763543
41	1.31178		0.783206
43	1.31995		0.801085
49	1.31382		0.787706
55	1.15162		0.407414
strain 30
	slope		(doubling time) -1
Temperature	y		y
17	1.15821		0.42386
27	1.28571		0.725281
37	1.3728		0.914423
39	1.37889		0.927196
41	1.38258		0.934911
43	1.37829		0.925921
49	1.37229		0.913346
55	1.05775		0.162027
strain 28
	slope		(doubling time) -1
Temperature	y		y
17	1.3697		0.906636
27	1.42625		1.02459
37	1.52253		1.2132
39	1.4971		1.1641
41	1.48341		1.13798
43	1.35995		0.887066
49	1.2296		0.596201
55	1.11728		0.32004
strain 11
	slope		(doubling time) -1
Temperature	y		y
17	1.30698		0.77253
27	1.36522		0.898453
37	1.55593		1.27573
39	1.52135		1.21091
41	1.49022		1.15127
43	1.45366		1.07944
49	1.20807		0.54549
55	1.10224		0.280946
strain 51
	slope		(doubling time) -1
Temperature	y		y
17	1.2203		0.574575
27	1.35702		0.881065
37	1.53497		1.23615
39	1.57672		1.31322
41	1.53776		1.24189
43	1.43164		1.03549
49	1.21427		0.558667
55	1.08289		0.229828

## Sheet: Table 4
Data for figure 5. Calculated Doubling times (Fig 5) from data in supplementary table 3. Data reordered for anova comparissons.
	a) species				b) environment
	strain 21				strain 21
		(doubling time)-1				(doublng time)-1
	Temperature	y			Temperature	y
	17	0.201403			17	0.201403
	27	0.556154			27	0.556154
	37	0.788042			37	0.788042
	39	0.73366			39	0.73366
	41	0.738224			41	0.738224
	43	0.730182			43	0.730182
	49	0.593054			49	0.593054
	55	0.0868202			55	0.0868202
	strain 90				strain 90
		(doubling time)-1				(doubling time)-1
	Temperature	y			Temperature	y
	17	0.567156			17	0.567156
	27	0.859638			27	0.859638
	37	0.962636			37	0.962636
	39	0.950092			39	0.950092
	41	0.937897			41	0.937897
	43	0.884984			43	0.884984
	49	0.222355			49	0.222355
	55	0.202347			55	0.202347
	strain 427				strain 427
		(doubling time)-1				(doubling time)-1
	Temperature	y			Temperature	y
	17	0.19733			17	0.19733
	27	0.572498			27	0.572498
	37	0.748132			37	0.748132
	39	0.680025			39	0.680025
	41	0.719076			41	0.719076
	43	0.665532			43	0.665532
	49	0.628033			49	0.628033
	55	0.0811952			55	0.0811952
	strain PY79				strain PY79
		(doubling time)-1				(doubling time)-1
	Temperature	y			Temperature	y
	17	0.422			17	0.422
	27	0.77037			27	0.77037
	37	0.893457			37	0.893457
	39	0.89813			39	0.89813
	41	0.931738			41	0.931738
	43	0.91433			43	0.91433
	49	0.763661			49	0.763661
	55	0.171254			55	0.171254
	strain 370a				strain 370a
		(doublng time)-1				(doubling time)-1
	Temperature	y			Temperature	y
	17	0.772522			17	0.772522
	27	1.04902			27	1.04902
	37	1.17915			37	1.17915
	39	1.1194			39	1.1194
	41	1.04049			41	1.04049
	43	0.702715			43	0.702715
	49	0.33969			49	0.33969
	55	0.290365			55	0.290365
	strain 102				strain 102
		(doublng time)-1				(doubling time)-1
	Temperature	y			Temperature	y
	17	0.768215			17	0.768215
	27	1.11213			27	1.11213
	37	1.17739			37	1.17739
	39	1.11784			39	1.11784
	41	1.11313			41	1.11313
	43	0.677194			43	0.677194
	49	0.36525			49	0.36525
	55	0.296182			55	0.296182
	strain 111b				strain 111b
		(doublng time)-1				(doubling time)-1
	Temperature	y			Temperature	y
	17	0.781033			17	0.781033
	27	1.07904			27	1.07904
	37	1.1506			37	1.1506
	39	1.06544			39	1.06544
	41	1.03202			41	1.03202
	43	0.474021			43	0.474021
	49	0.301437			49	0.301437
	55	0.28051			55	0.28051
	strain 45				strain 45
		(doubling time)-1				(doubling time)-1
	Temperature	y			Temperature	y
	17	0.168551			17	0.168551
	27	0.530382			27	0.530382
	37	0.748137			37	0.748137
	39	0.752933			39	0.752933
	41	0.785287			41	0.785287
	43	0.787826			43	0.787826
	49	0.819119			49	0.819119
	55	0.582463			55	0.582463
	strain 2				strain 2
		(doubling time)-1				(doubling time)-1
	Temperature	x			Temperature	y
	17	0.0663048			17	0.0663048
	27	0.342931			27	0.342931
	37	0.626112			37	0.626112
	39	0.763543			39	0.763543
	41	0.783206			41	0.783206
	43	0.801085			43	0.801085
	49	0.787706			49	0.787706
	55	0.407414			55	0.407414
	strain 30				strain 30
		(doubling time)-1				(doubling time)-1
	Temperature	y			Temperature	y
	17	0.42386			17	0.42386
	27	0.725281			27	0.725281
	37	0.914423			37	0.914423
	39	0.927196			39	0.927196
	41	0.934911			41	0.934911
	43	0.925921			43	0.925921
	49	0.913346			49	0.913346
	55	0.162027			55	0.162027
	strain 28				strain 28
		(doubling time)-1				(doubling time)-1
	Temperature	y			Temperature	y
	17	0.906636			17	0.906636
	27	1.02459			27	1.02459
	37	1.2132			37	1.2132
	39	1.1641			39	1.1641
	41	1.13798			41	1.13798
	43	0.887066			43	0.887066
	49	0.596201			49	0.596201
	55	0.32004			55	0.32004
	strain 11				strain 11
		(doubling time)-1				(doubling time)-1
	Temperature	y			Temperature	y
	17	0.77253			17	0.77253
	27	0.898453			27	0.898453
	37	1.27573			37	1.27573
	39	1.21091			39	1.21091
	41	1.15127			41	1.15127
	43	1.07944			43	1.07944
	49	0.54549			49	0.54549
	55	0.280946			55	0.280946
	strain 51				strain 51
		(doubling time)-1				(doubling time)-1
	Temperature	y			Temperature	y
	17	0.574575			17	0.574575
	27	0.881065			27	0.881065
	37	1.23615			37	1.23615
	39	1.31322			39	1.31322
	41	1.24189			41	1.24189
	43	1.03549			43	1.03549
	49	0.558667			49	0.558667
	55	0.229828			55	0.229828

## Sheet: Table 5
Table 5a. Data for figure 6 BAR PLOTS for total count and spore count LOGARITMIC CURVES AND K CONSTANTS for sensitivity to temperature
				replicate1	replicate2	replicate3	mean	sd
B. subtilis lineage	hot spring	37 C	Bs_45_Tot	1100000000	53000000	180000000	4.44333e+08	5.71364e+08			values used to calculate sensitivity to Temperature (logaritmic death)
			Bs_45_spo	510000000	6200000	11000000	1.75733e+08	2.89493e+08			between 37 and 50°C
		44 C	Bs_45_Tot	960000000	420000000	220000000	5.33333e+08	3.82797e+08
			Bs_45_spo	39000000	24000000	4800000	22600000	1.71429e+07
		50 C	Bs_45_Tot	100000000	35000000		67500000	4.59619e+07
			Bs_45_spo	160000	1100000		630000	664680
		37 C	Bs_30_Tot	37000000	410000000	220000000	2.22333e+08	1.86511e+08			T1	T2	N1	N2	k	group mean
			Bs_30_spo	2800000	20800000	27200000	1.69333e+07	1.26512e+07		Bs_45	37	50	4.44333e+08	67500000	-0.144957	-0.181781
		44 C	Bs_30_Tot	15000000	229000000		122000000	1.51321e+08		Bs_30	37	50	2.22333e+08	13900000	-0.213253
			Bs_30_spo	900000	500000		700000	282843		Bs_2	37	50	3.33267e+08	29260000	-0.187132
		50 C	Bs_30_Tot	17000000	10800000		13900000	4.38406e+06		Bs_PY79	37	50	9.37667e+06	773333	-0.191944	-0.197186
			Bs_30_spo	1900000	2900000		2400000	707107		Bs_21	37	50	1.09333e+08	7.23333e+07	-0.0317782
										Bs_427	37	50	426500000	2.36333e+07	-0.222535
		37 C	Bs_2_Tot	940000000	1800000	58000000	3.33267e+08	5.26197e+08		Bs_90	37	50	2.35733e+08	2.74667e+06	-0.342486
			Bs_2_spo	870000000	110000	340000	290150000	5.02165e+08		Bc_51	37	50	2.25667e+07	459333	-0.299573	-0.311479
		44 C	Bs_2_Tot	890000000	220000	10000000	450000000	5.10915e+08		Bc_28	37	50	1.33333e+07	770000	-0.219356
			Bs_2_spo	77000000	250000	1900000	39450000	4.38431e+07		Bc_11	37	50	2.13333e+07	96200	-0.415507
		50 C	Bs_2_Tot	58000000	520000		29260000	4.06445e+07		Bc_102	37	50	907500000	2.76671e+06	-0.445618	-0.338399
			Bs_2_spo	8400000	11000		4205500	5.93192e+06		Bc_370a	37	50	4.26667e+07	377333	-0.363696
										Bc_111b	37	50	1.82667e+07	1.25683e+06	-0.205883
	temperatre lagoon	37 C	Bs_PY79_Tot	27000000	320000	810000	9.37667e+06	1.52642e+07
			Bs_PY79_spo	37000	34000	480000	183667	256637
		44 C	Bs_PY79_Tot	27000000	90000	5100000	10730000	1.43112e+07
			Bs_PY79_spo	64000	88000	210000	120667	78290.1
		50 C	Bs_PY79_Tot	20000	1200000	1100000	773333	654319
			Bs_PY79_spo	7700	73000	120000	66900	56398
		37 C	Bs_21_Tot	290000000	17000000	21000000	1.09333e+08	1.56475e+08
			Bs_21_spo	5400000	210000	140000	1.91667e+06	3.01686e+06
		44 C	Bs_21_Tot	300000000	50000000	23000000	1.24333e+08	1.5273e+08
			Bs_21_spo	5000000	3000000	5400000	4.46667e+06	1.28582e+06
		50 C	Bs_21_Tot	39000000	70000000	108000000	7.23333e+07	3.45591e+07
			Bs_21_spo	3400	860000	320000	394467	433128
		37 C	Bs_427_Tot	830000000		23000000	426500000	5.70635e+08
			Bs_427_spo	11000000		21000000	16000000	7.07107e+06
		44 C	Bs_427_Tot	190000000	56000000		123000000	9.47523e+07
			Bs_427_spo	63000000	700000		31850000	4.40528e+07
		50 C	Bs_427_Tot	3300000	66000000	1600000	2.36333e+07	3.67005e+07
			Bs_427_spo	160000	50000000	1400000	1.71867e+07	2.84239e+07
		37 C	Bs_90_Tot	700000000	1100000	6100000	2.35733e+08	4.02074e+08
			Bs_90_spo	320000	650000	1000000	656667	340049
		44 C	Bs_90_Tot	76000000	7200000	4400000	29200000	4.05542e+07
			Bs_90_spo	470	1100000	1500000	866823	776483
		50 C	Bs_90_Tot	140000	4400000	3700000	2.74667e+06	2.28441e+06
			Bs_90_spo	1600	1100000	2200000	1.10053e+06	1.0992e+06
B. cereus lineage	hot spring	37 C	Bc_51_veg	15000000	4700000	48000000	2.25667e+07	2.262e+07
			Bc_51_spo	49000	760000	620000	476333	376644
		44 C	Bc_51_veg	500000	15000000	320000	5.27333e+06	8.42402e+06
			Bc_51_spo	57000	3500	5500	22000	30327.4
		50 C	Bc_51_veg	51000	1300000	27000	459333	728138
			Bc_51_spo	25000	880	2900	9593.33	13380.7
		37 C	Bc_28_veg	4000000	19000000	17000000	1.33333e+07	8.14453e+06
			Bc_28_spo	12000	100000	1400000	504000	777205
		44 C	Bc_28_veg	250000	16000000	100000	5450000	9.13688e+06
			Bc_28_spo	66000	55000	90000	70333.3	17897.9
		50 C	Bc_28_veg	240000	1300000		770000	749533
			Bc_28_spo	36000	46000		41000	7071.07
		37 C	Bc_11_veg	17000000	21000000	26000000	2.13333e+07	4.50925e+06
			Bc_11_spo	4300	64000	350000	139433	184783
		44 C	Bc_11_veg	16000	25000000	1800000	8.93867e+06	1.39381e+07
			Bc_11_spo	120	9000	47000	18706.7	24901.8
		50 C	Bc_11_veg	8600	130000	150000	96200	76520.1
			Bc_11_spo	3	47000	3100	16701	26285.4
	temperatre lagoon	37 C	Bc_102_veg	2500000000	2500000	220000000	907500000	1.38343e+09
			Bc_102_spo	3400	880000	140000	341133	471644
		44 C	Bc_102_veg	130	1700000		850065	1.20199e+06
			Bc_102_spo	1	560000		280000	395979
		50 C	Bc_102_veg	120	6100000	2200000	2.76671e+06	3.08917e+06
			Bc_102_spo	1	2600000	810000	1136667	1.33043e+06
		37 C	Bc_370a_veg	24000000	83000000	21000000	4.26667e+07	3.49619e+07
			Bc_370a_spo	43000	190000	180000	137667	82136.1
		44 C	Bc_370a_veg	220000		4200000	2210000	2.81428e+06
			Bc_370a_spo	220		250000	125110	176621
		50 C	Bc_370a_veg	52000	530000	550000	377333	281924
			Bc_370a_spo	270	260000	330000	196757	173725
		37 C	Bc_111b_veg	45000000	1600000	8200000	1.82667e+07	2.33858e+07
			Bc_111b_spo	2	20000	120000	46667.3	64290.3
		44 C	Bc_111b_veg	1200	3700000	240000	1.31373e+06	2.07001e+06
			Bc_111b_spo	0	56000	23000	26333.3	28148.4
		50 C	Bc_111b_veg	500	370000	3400000	1.25683e+06	1.86521e+06
			Bc_111b_spo	1	41000	11000	17333.7	21220.7
Table 5b sporulation percentages. Black bars in barplots
				replicate1	replicate2	replicate3	mean	sd		replicate1	replicate2	replicate3	% mean
B. subtilis lineage	hot spring	37 C	Bs_45_spo	510000000	6200000	11000000	1.75733e+08	2.89493e+08		46.3636	11.6981	6.11111	21.391
		44 C	Bs_45_spo	39000000	24000000	4800000	22600000	1.71429e+07		4.0625	5.71429	2.18182	3.9862
		50 C	Bs_45_spo	160000	1100000		630000	664680		0.16	3.14286		1.65143
		37 C	Bs_30_spo	2800000	20800000	27200000	1.69333e+07	1.26512e+07		7.56757	5.07317	12.3636	8.33479
		44 C	Bs_30_spo	900000	500000		700000	282843		6	0.218341		3.10917
		50 C	Bs_30_spo	1900000	2900000		2400000	707107		11.1765	26.8519		19.0142
		37 C	Bs_2_spo	870000000	110000	340000	290150000	5.02165e+08		92.5532	6.11111	0.586207	33.0835
		44 C	Bs_2_spo	77000000	250000	1900000	39450000	4.38431e+07		8.65169		19	13.8258
		50 C	Bs_2_spo	8400000	11000		4205500	5.93192e+06		14.4828	2.11538		8.29907
B. subtilis lineage	temperatre lagoon	37 C	Bs_PY79_spo	37000	34000	480000	183667	256637		0.137037	10.625	59.2593	23.3404
		44 C	Bs_PY79_spo	64000	88000	210000	120667	78290.1		0.237037	97.7778	4.11765	34.0442
		50 C	Bs_PY79_spo	7700	73000	120000	66900	56398		38.5	6.08333	10.9091	18.4975
		37 C	Bs_21_spo	5400000	210000	140000	1.91667e+06	3.01686e+06		1.86207	1.23529	0.666667	1.25468
		44 C	Bs_21_spo	5000000	3000000	5400000	4.46667e+06	1.28582e+06		1.66667	6	23.4783	10.3816
		50 C	Bs_21_spo	3400	860000	320000	394467	433128		0.00871795	1.22857	0.296296	0.511195
		37 C	Bs_427_spo	11000000		21000000	16000000	7.07107e+06		1.3253		91.3043	46.3148
		44 C	Bs_427_spo	63000000	700000		31850000	4.40528e+07		33.1579	1.25		17.2039
		50 C	Bs_427_spo	160000	50000000	1400000	1.71867e+07	2.84239e+07		4.84848	75.7576	87.5	56.0354
		37 C	Bs_90_spo	320000	650000	1000000	656667	340049		0.0457143	59.0909	16.3934	25.1767
		44 C	Bs_90_spo	470	1100000	1500000	866823	776483		0.000618421	15.2778	34.0909	16.4564
		50 C	Bs_90_spo	1600	1100000	2200000	1.10053e+06	1.0992e+06		1.14286	25	59.4595	28.5341
B. cereus lineage	hot spring	37 C	Bc_51_spo	49000	760000	620000	476333	376644		0.326667	16.1702	1.29167	5.92952
		44 C	Bc_51_spo	57000	3500	5500	22000	30327.4		11.4	0.0233333	1.71875	4.38069
		50 C	Bc_51_spo	25000	880	2900	9593.33	13380.7		49.0196	0.0676923	10.7407	19.9427
		37 C	Bc_28_spo	12000	100000	1400000	504000	777205		0.3	0.526316	8.23529	3.02054
		44 C	Bc_28_spo	66000	55000	90000	70333.3	17897.9		26.4	0.34375	90	38.9146
		50 C	Bc_28_spo	36000	46000		41000	7071.07		15	3.53846		9.26923
		37 C	Bc_11_spo	4300	64000	350000	139433	184783		0.0252941	0.304762	1.34615	0.558737
		44 C	Bc_11_spo	120	9000	47000	18706.7	24901.8		0.75	0.036	2.61111	1.13237
		50 C	Bc_11_spo	3	47000	3100	16701	26285.4		0.0348837	36.1538	2.06667	12.7518
B. cereus lineage	temperatre lagoon	37 C	Bc_102_spo	3400	880000	140000	341133	471644		0.000136	35.2	0.0636364	11.7546
		44 C	Bc_102_spo	1	560000		280000	395979		0.769231	32.9412		16.8552
		50 C	Bc_102_spo	1	2600000	810000	1136667	1.33043e+06		0.833333	42.623	36.8182	26.7582
		37 C	Bc_370a_spo	43000	190000	180000	137667	82136.1		0.179167	0.228916	0.857143	0.421742
		44 C	Bc_370a_spo	220		250000	125110	176621		0.1		5.95238	3.02619
		50 C	Bc_370a_spo	270	260000	330000	196757	173725		0.519231	49.0566	60	36.5253
		37 C	Bc_111b_spo	2	20000	120000	46667.3	64290.3		4.44444e-06	1.25	1.46341	0.904473
		44 C	Bc_111b_spo	0	56000	23000	26333.3	28148.4		0	1.51351	9.58333	3.69895
		50 C	Bc_111b_spo	1	41000	11000	17333.7	21220.7		0.2	11.0811	0.323529	3.8682
